# Supplementary material
Source: PubMed Central journal article supplement (PMC7081156)

## Supplementary Online Content

Kathuria A, Lopez-Lengowski K, Jagtap SS, et al. Transcriptomic landscape and functional characterization of induced pluripotent stem cells–derived cerebral organoids in schizophrenia. *JAMA Psychiatry*. Published online March 18, 2020. doi:10.1001/jamapsychiatry.2020.0196.

- eFigure 1.** Generation and characterization of cerebral organoids from human iPSCs
- eFigure 2.** iPSC characterization
- eFigure 3.** Gene ontology (GO) analysis of differentially expressed genes (DEGs) in schizophrenia cerebral organoids
- eFigure 4.** Cerebral organoid characterization
- eFigure 5.** RT-PCR validation of DEGs
- eFigure 6.** Synaptic staining and western blots of cerebral organoids
- eFigure 7.** Mitochondrial DEGs in SCZ organoids
- eFigure 8.** Raster Plots from MEAs
- eTable 1.** Demographic and treatment information on subjects
- eTable 2.** GO analysis of DEGs that are associated specifically with SCZ, BPD or ASD.
- eTable 3.** Excitatory and inhibitory genes: up-regulated DEGs
- eTable 4.** Excitatory and inhibitory genes: down-regulated DEGs
- eTable 5.** Primary antibodies used
- eTable 6.** KaryoSTAT codes for each line

This supplementary material has been provided by the authors to give readers additional information about their work.

## Supplementary Figures

**A**

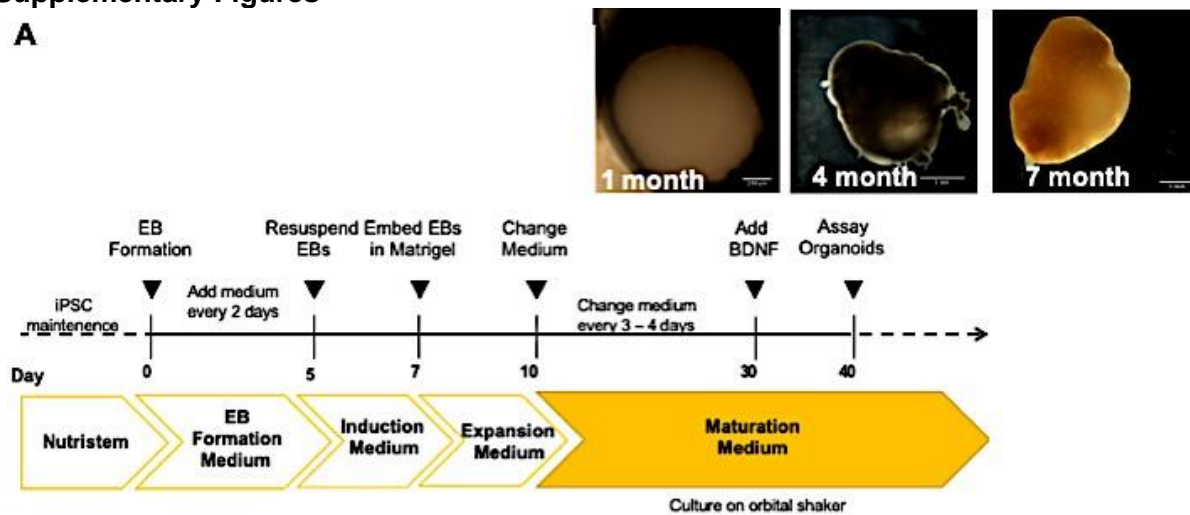

**B**

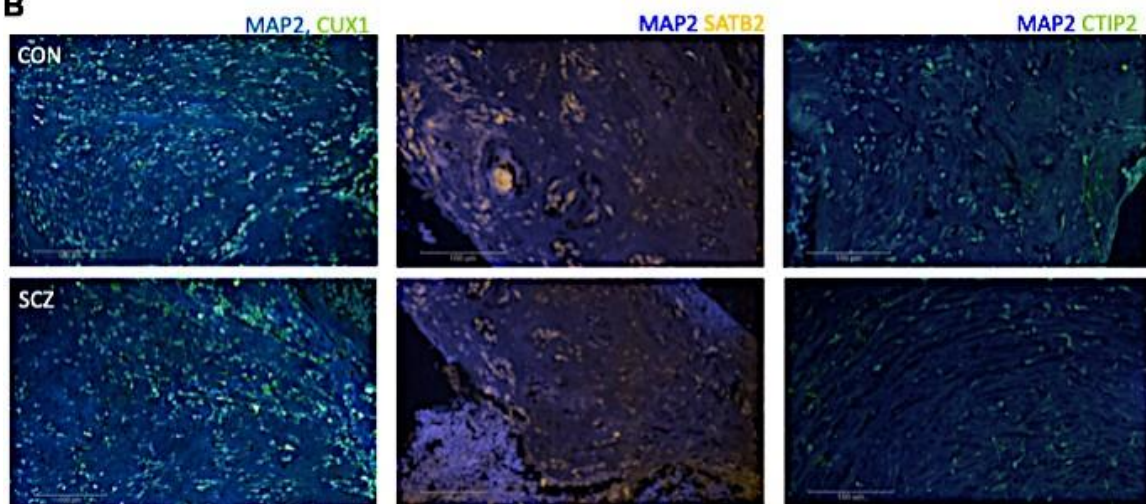

**C**

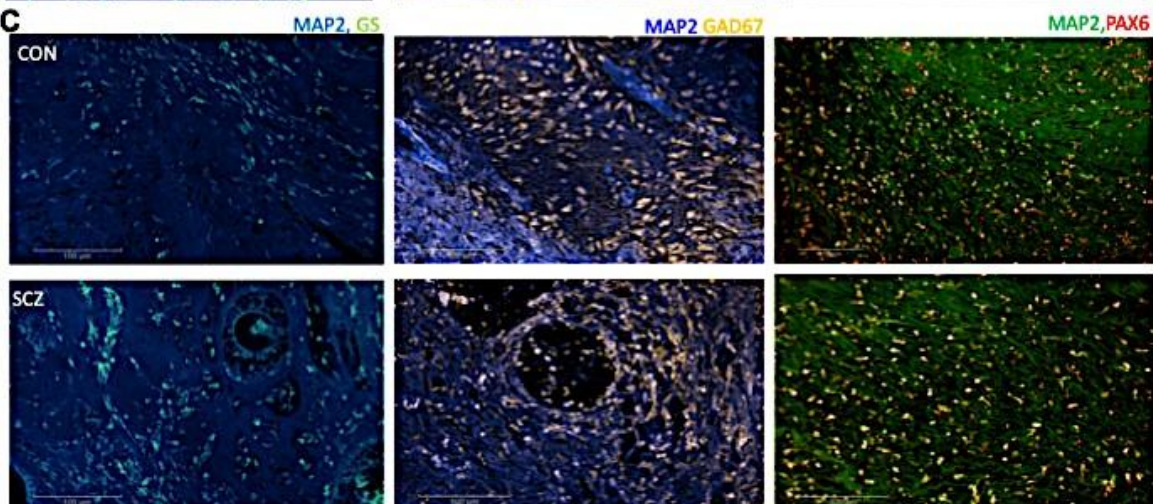

**eFigure 1: Generation and characterization of cerebral organoids from human iPSCs.** A) Protocol used for generation of cerebral organoids along with phase contrast images at different stages of development. Scale bar: 250  $\mu\text{m}$  for image from 1 month and 1 mm for images from 4 months and 7 months. (B-F) Immunohistochemistry of cerebral organoid slices from schizophrenia and control iPSCs. Scale bar: 100  $\mu\text{m}$ .

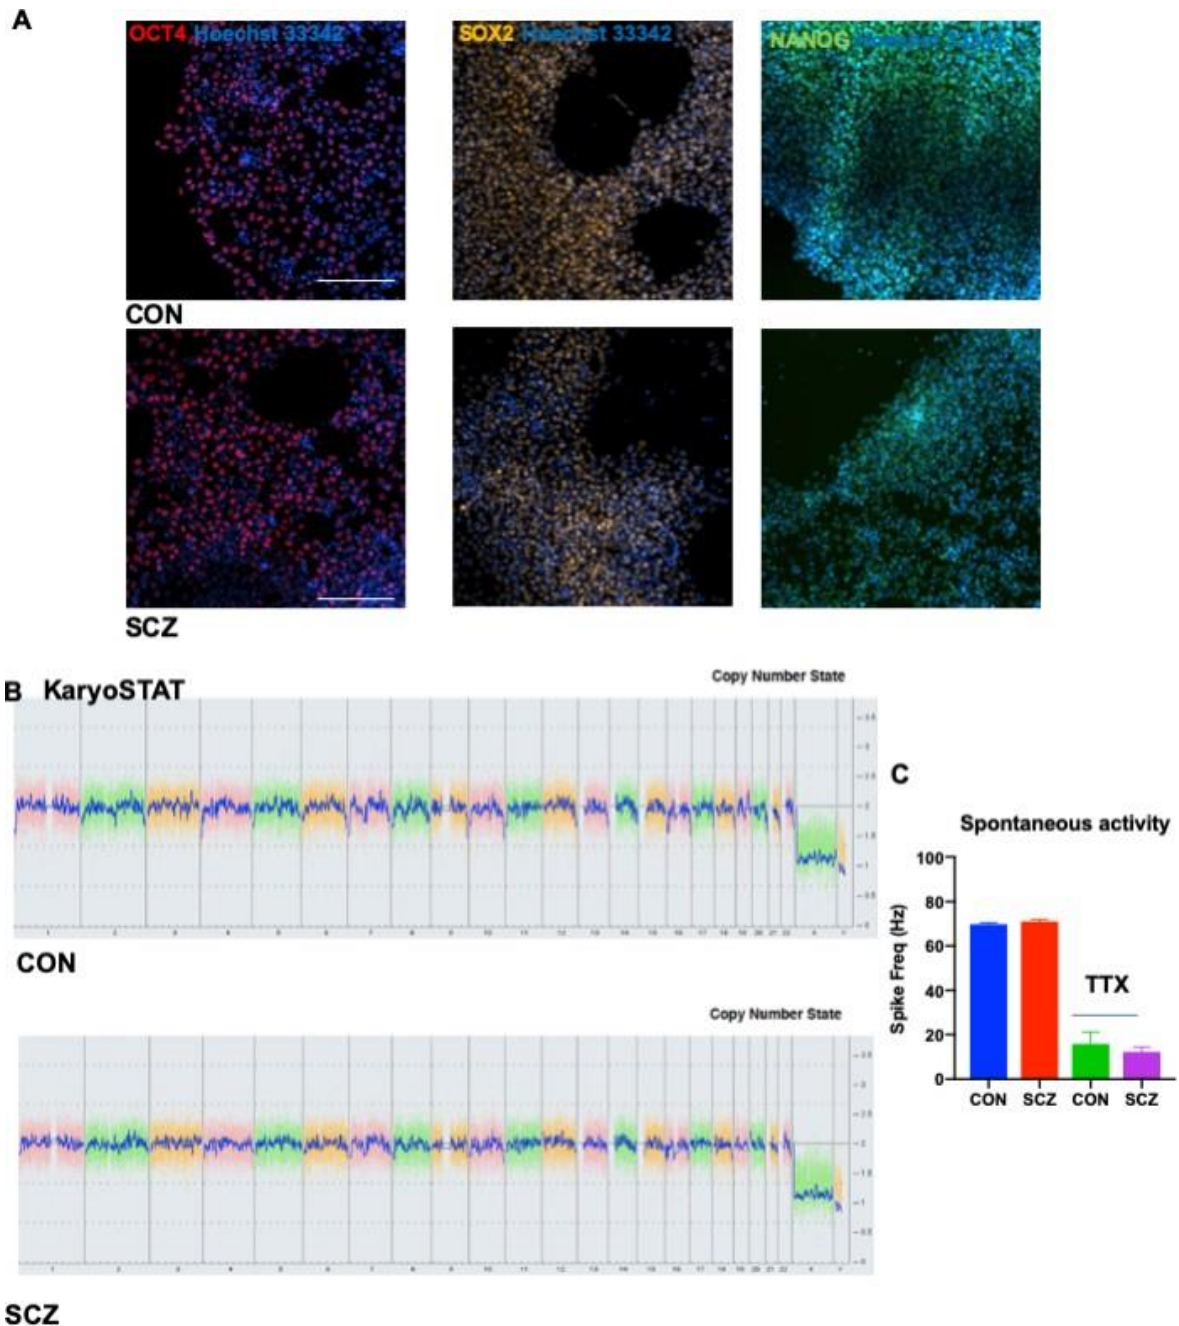

**eFigure 2. iPSC characterization.** (A) Representative images of immunocytochemistry of CON, SCZ iPSC lines which were positive for Nanog (green), Oct4 (red), SOX2 (yellow), and Hoechst (blue). Scale=50 $\mu$ m. This assay has been done for all 16 iPSC lines data will be available on request. (B) Representative images of the whole genome view of one CON line and one SCZ line. The whole genome view displays all somatic and sex chromosomes in one frame with high level copy number. The smooth signal plot (right y-axis) is the smoothing of the log<sub>2</sub> ratios which depict the signal intensities of probes on the microarray. A value of 2 represents a normal copy number state (CN = 2). A value of 3 represents chromosomal gain (CN = 3). A value of 1 represents a chromosomal loss (CN = 1). The pink, green and yellow colors indicate the raw signal for each individual chromosome probe, while the blue signal represents the normalized probe signal which is used to identify copy number and aberrations (if any). (C) Spontaneous activity of CON and SCZ cerebral organoids with and without TTX 1mM.

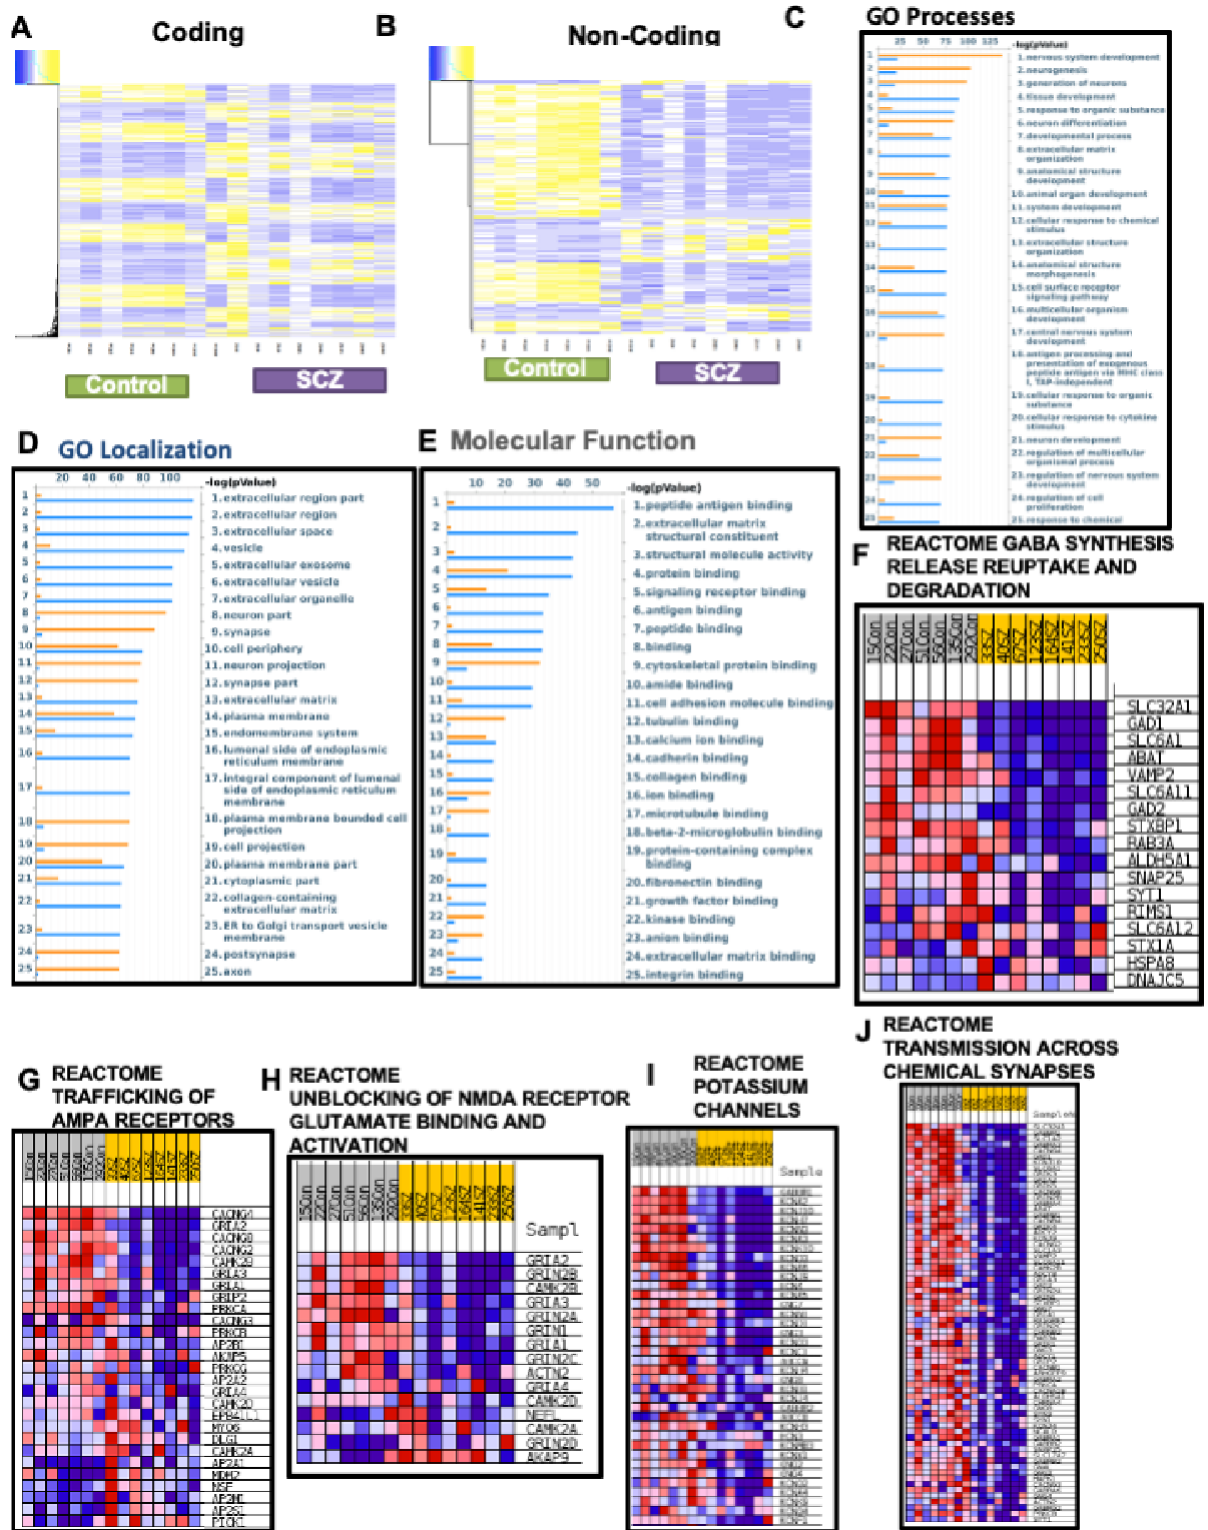

**eFigure 3. Gene ontology (GO) analysis of differentially expressed genes (DEGs) in schizophrenia cerebral organoids.** (A-B) Heat maps of DEGs for coding and non-coding genes in six-month-old cerebral organoids differentiated from schizophrenia and control iPSCs. (C-E) GO analysis for process, localization and molecular function for DEGs, rank-ordered according to significance (p value) and depicted as up-regulated (blue) or down-regulated (orange) genes. (F-J) Results of gene set enrichment analysis (GSEA) of DEGs depicted as heat maps, with red depicting high expression and blue depicting low to no expression.

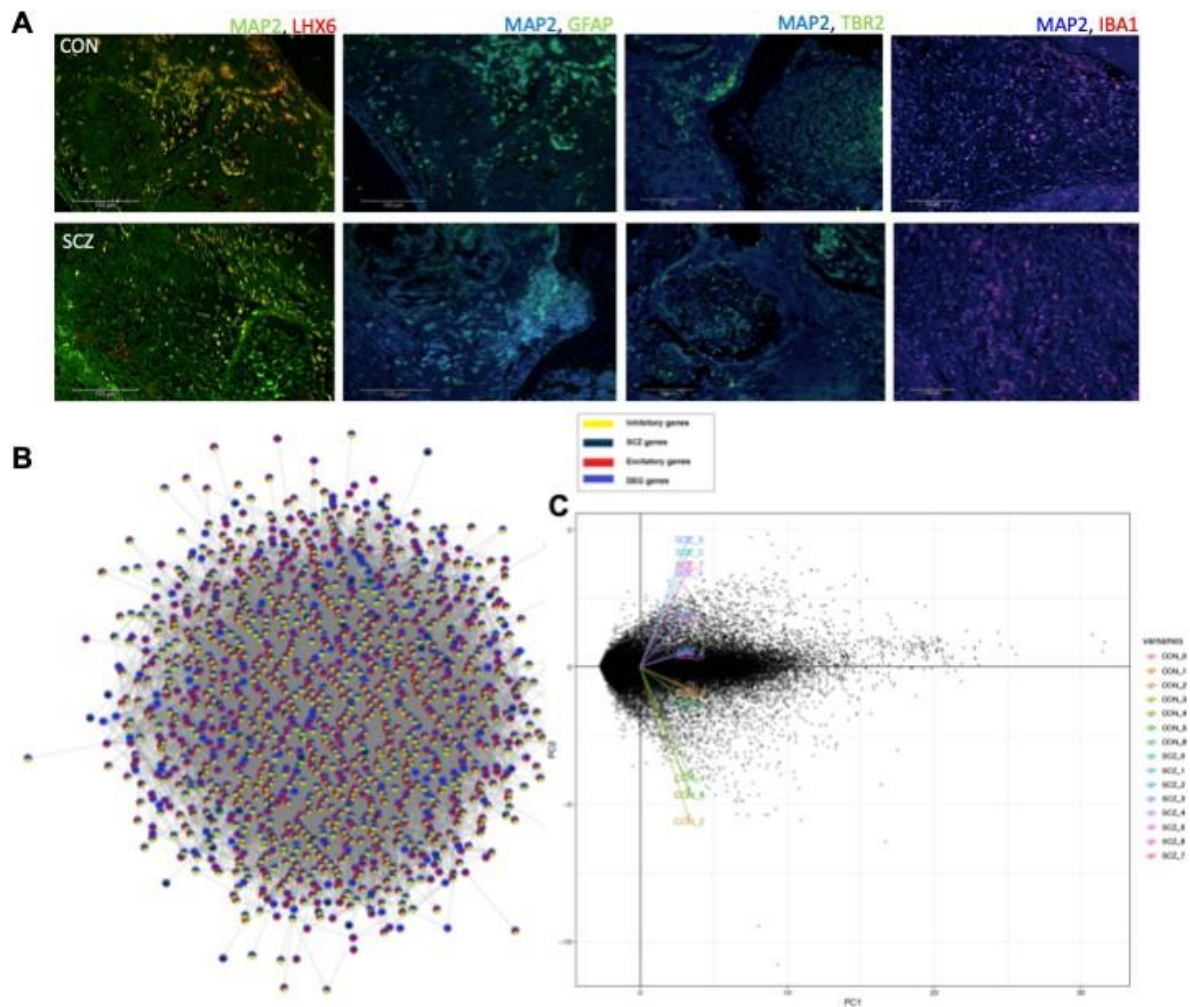

**eFigure 4: Cerebral organoid characterization.** (A) High-magnification images of IHC staining. Scale bar:100 $\mu$ m. (B) Visualization of gene co-expression of DEGs with genes expressed in excitatory and inhibitory neurons. (C) Principal component analysis (PCA) to show the distribution of CON and SCZ iPSC line generated organoid population.

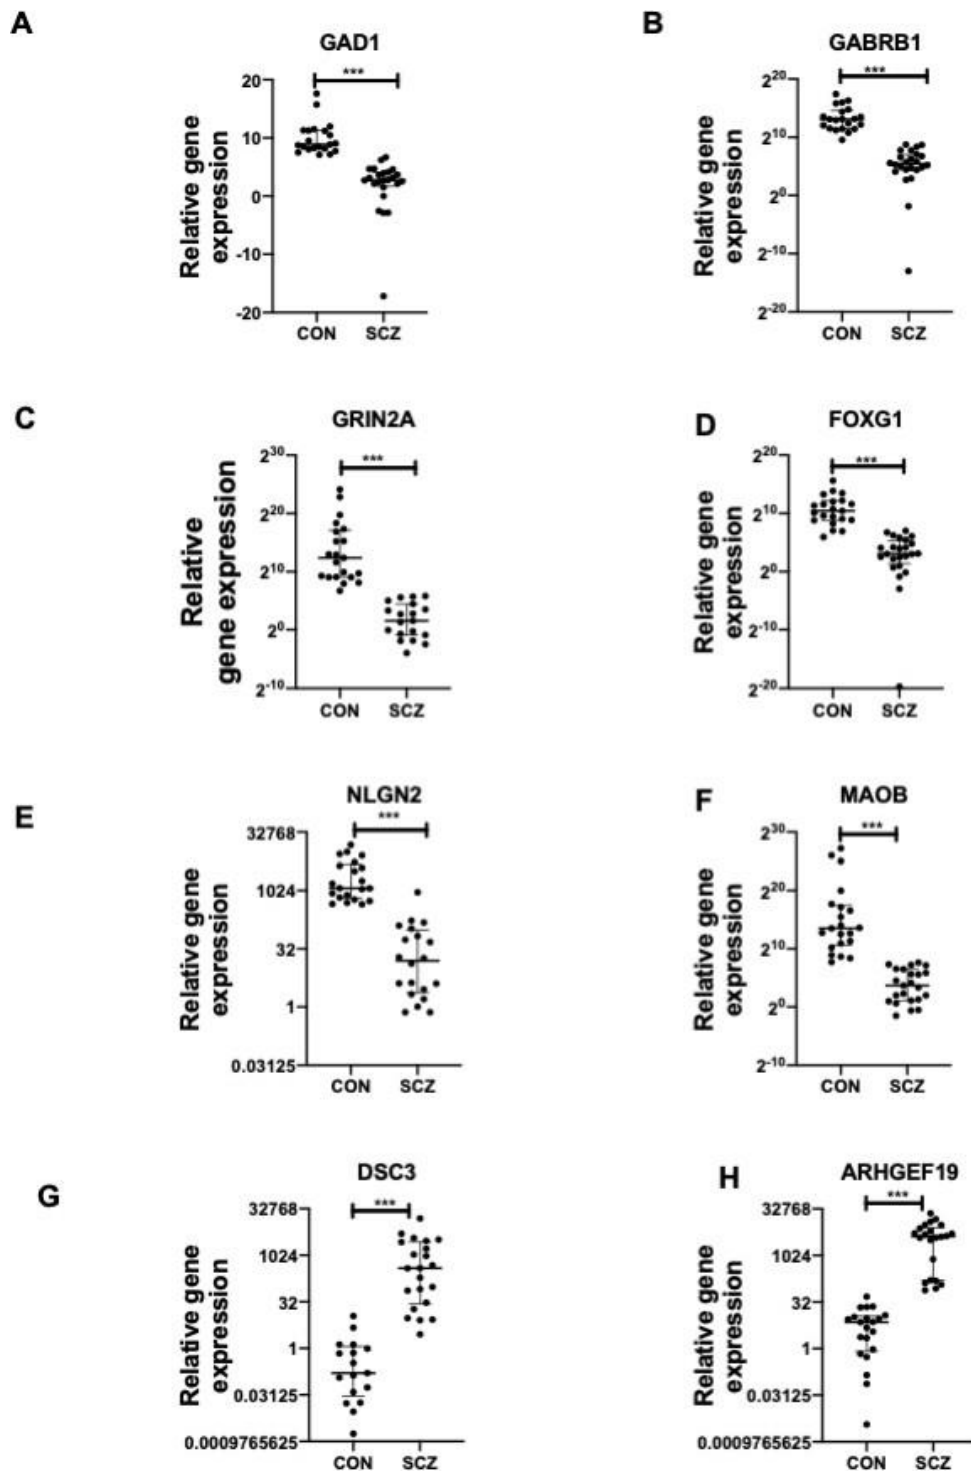

**eFigure 5: RT-PCR validation of DEGs.** (A-H) Graphs showing relative gene expression in cerebral organoids compared to a control iPSC line assessed via quantitative PCR (qPCR). Values are median±IQR. Mann–Whitney U-test was performed. The significant differences between CON and SCZ groups are shown as \*\*\* $p < 0.001$ . The assay was performed in seven CON and eight SCZ lines, each with three replicates.

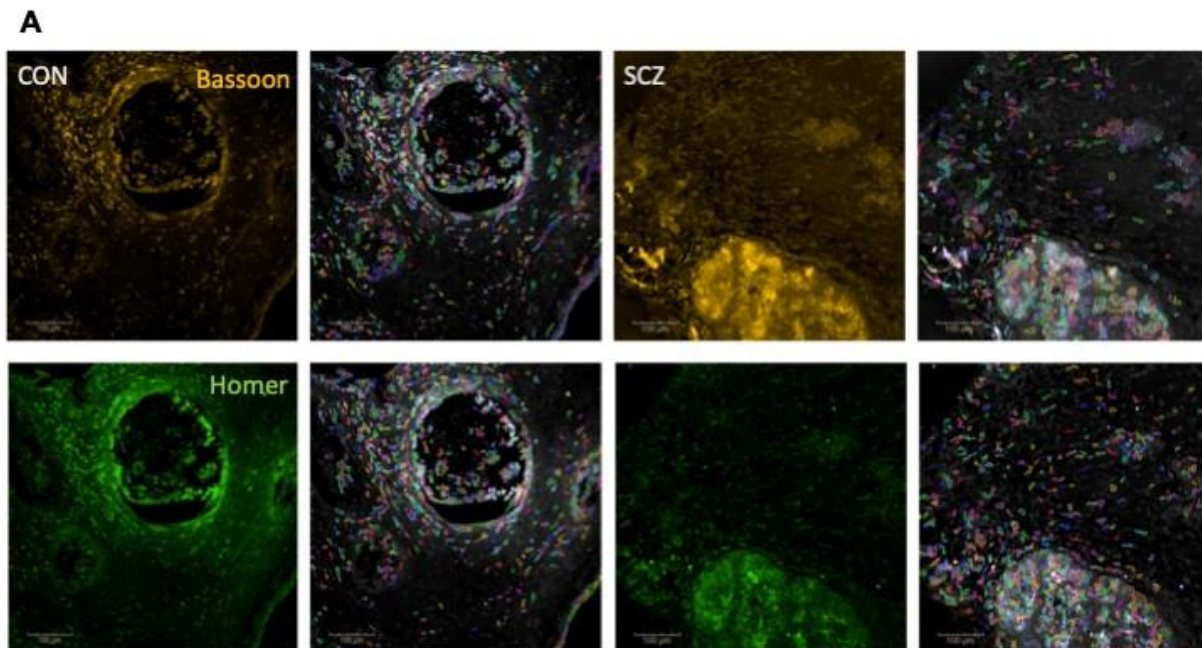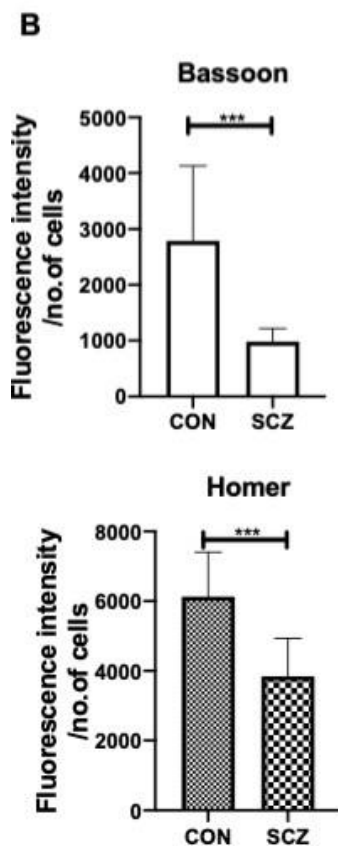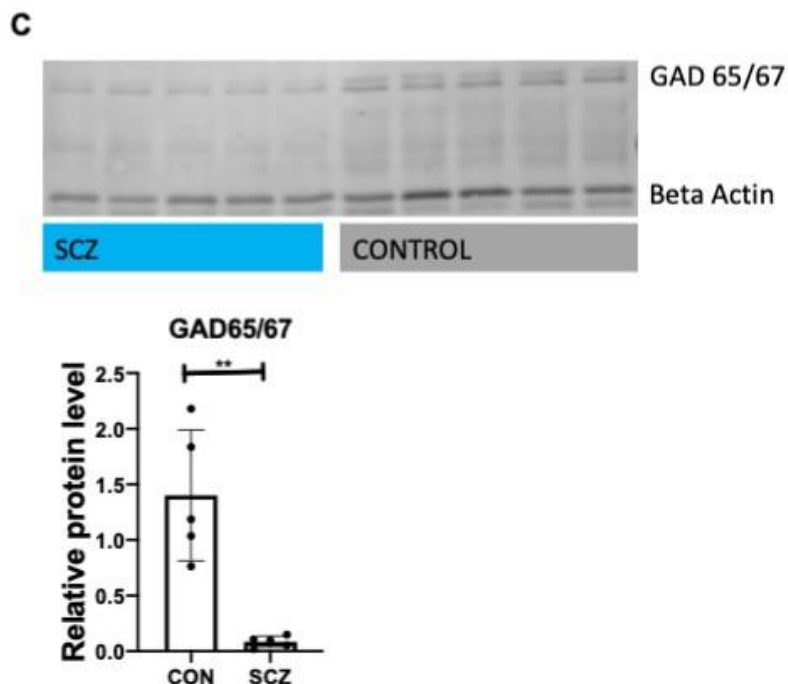

**eFigure 6. Synaptic staining and western blots of cerebral organoids.** (A) High-magnification images of IHC synaptic staining. Scale bar:100 $\mu$ m. (B) Quantification of synaptic staining in CON and SCZ, Values are median $\pm$ IQR. Mann-Whitney U-test was performed. The significant differences between CON and SCZ groups is shown as \*\*\* $p < 0.001$ . Bassoon Basal -Two-tailed, Sum of ranks in column CON, SCZ- 4317264 , 145314, Mann-Whitney U- 5129 \*\*\* $p = 0.0001$ . Homer, Basal -Two- tailed, Sum of ranks in column CON, SCZ- 87908515 , 1222762, Mann-Whitney U- 1022101\*\*\* $p = 0.0001$  The assay was performed in three CON lines and three SCZ, each with three replicates. (C) GAD65/67 Western Blot and Quantification. Values are mean $\pm$ SD. Student t-test was performed. R squared- 0.8598, CI 95 %- -2.043 to -0.5877, \*\* $p = 0.0073$ . Each lane represents protein lysates from one organoid. 5 SCZ lines were compared to 5 CON lines.

### A Metabolic pathway

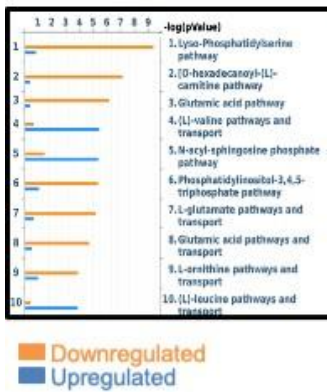

### B

| Mitochondrial genes | Expression in SCZ | log2(fold_change) | p_value |
|---------------------|-------------------|-------------------|---------|
| KIF1B               | Down-regulated    | -1.30042          | 0.00005 |
| CRY1                | Down-regulated    | -1.07481          | 0.00005 |
| LAMC1               | Up-regulated      | 1.0244            | 0.00005 |
| ABAT                | Down-regulated    | -2.02492          | 0.00005 |
| TUBB3               | Down-regulated    | -1.28465          | 0.00005 |
| DSC3                | Up-regulated      | 2.10279           | 0.00005 |
| MAOB                | Down-regulated    | -2.1467           | 0.00005 |
| DBI                 | Down-regulated    | -1.17749          | 0.00005 |
| DDAH1               | Down-regulated    | -1.21465          | 0.00005 |
| MUC2                | Up-regulated      | 3.12201           | 0.00005 |

**eFigure 7: Mitochondrial DEGs in SCZ organoids.** (A) Metabolic pathways that were most differentially regulated in schizophrenia cerebral organoids, listed according to significance (p value). (B) The top ten significant mitochondrial genes that were represented in the DEGs, listed according to significance (p value).



**A**  
Before Stimulus

After Stimulus

**B**  
After KCl

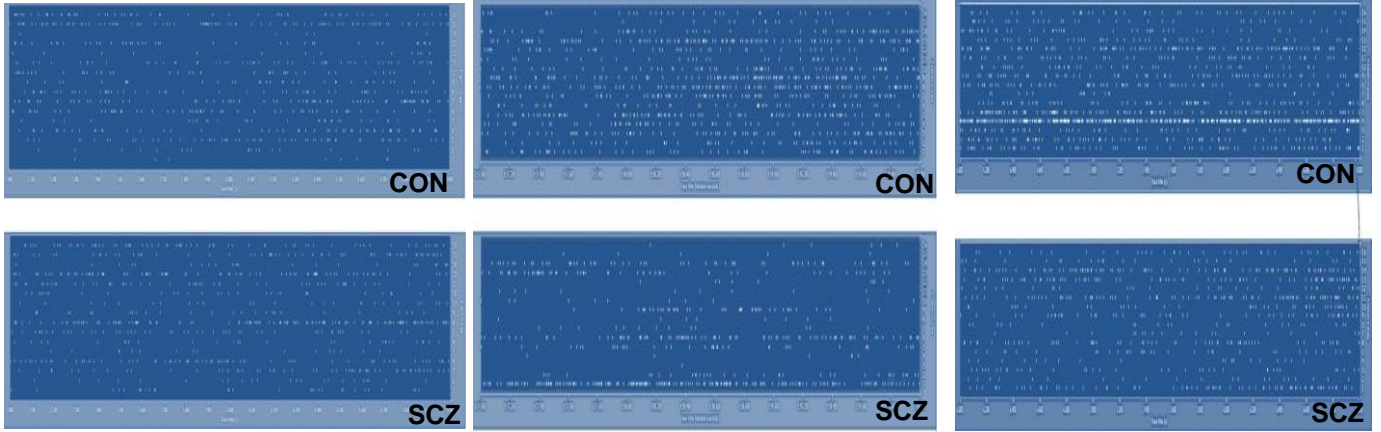

**eFigure 8: Raster plots from MEAs.** (A) Representative raster plot recording before and after electrical stimulation in control (CON) and schizophrenia (SCZ) organoids. (B) Raster plot recording after depolarization with 30 mM KCl.

**eTable 1. Demographic and treatment information on subjects**

| Sample ID | Diagnosis | Gender | Age | Race      | Age of onset | Antipsychotic history                           | Medical comorbidities        |
|-----------|-----------|--------|-----|-----------|--------------|-------------------------------------------------|------------------------------|
| ML-15     | Control   | Male   | 37  | Caucasian | -            |                                                 |                              |
| ML-22     | Control   | Male   | 24  | Caucasian | -            |                                                 |                              |
| ML-27     | Control   | Male   | 24  | Caucasian | -            |                                                 |                              |
| ML-33     | SCZ       | Male   | 32  | Caucasian | 22           | clozapine, risperidal, ziprasidone, haloperidol | None                         |
| ML-40     | SCZ       | Female | 46  | Caucasian | 13           | clozapine, haloperidol                          | hypertension, hypothyroidism |
| ML-51     | Control   | Male   | 31  | Caucasian | -            |                                                 |                              |
| ML-56     | Control   | Female | 52  | Caucasian | -            |                                                 |                              |
| ML-67     | SCZ       | Male   | 50  | Caucasian | 17           | clozapine                                       |                              |
| ML-123    | SCZ       | Male   | 32  | Caucasian | -            |                                                 |                              |
| ML-135    | Control   | Male   | 49  | Caucasian | -            |                                                 |                              |
| ML-141    | SCZ       | Male   | 40  | Caucasian | 24           | ariprazole                                      | None                         |
| ML-164    | SCZ       | Female | 67  | Caucasian | unknown      | perphenazine                                    | unknown                      |
| ML-233    | SCZ       | Female | 39  | Caucasian | unknown      | haloperidol                                     | hypothyroidism               |
| ML-250    | SCZ       | Male   | 23  | Caucasian | unknown      | ariprazole                                      | unknown                      |
| ML-292    | Control   | Male   | 43  | Caucasian | -            |                                                 |                              |
| ML-300    | Control   | Female | 32  | Caucasian | -            |                                                 |                              |

**eTable 2. GO analysis of DEGs that are associated specifically with SCZ, BPD or ASD.**

| <b>GO (DEGs CON vs SCZ) and SCZ</b> | <b>76 genes</b>                                | <b>p value</b> |
|-------------------------------------|------------------------------------------------|----------------|
| Localization                        | synapse                                        | 6.03E-09       |
| Process                             | nervous system development                     | 3.12E-13       |
| Molecular Function                  | phosphatase regulator activity                 | 2.56E-05       |
| <b>GO (DEGs CON vs SCZ) and ASD</b> | <b>217 genes</b>                               |                |
| Localization                        | luminal side of endoplasmic reticulum membrane | 6.35E-99       |
| Process                             | interferon-gamma-mediated signaling pathway    | 6.34E-95       |
| Molecular Function                  | peptide antigen binding                        | 5.68E-93       |
| <b>GO (DEGs CON vs SCZ) and BPI</b> | <b>18 genes</b>                                |                |
| Localization                        | integral component of presynaptic membrane     | 3.01E-03       |
| Process                             | regulation of presynaptic membrane potential   | 2.26E-07       |
| Molecular Function                  | pyruvate carboxylase activity                  | 7.77E-04       |

**eTable 3. Excitatory and inhibitory genes: Up-regulated DEGs.** List of top ten significantly up-regulated genes that are primarily expressed in excitatory and inhibitory neurons, listed according to significance ( $p$  value).

| <b>Up-regulated Excitatory genes</b> | <b>log2(fold-change)</b> | <b>p_value</b> |
|--------------------------------------|--------------------------|----------------|
| MUC12                                | 5.22054                  | 5.00E-05       |
| MUC5B                                | 4.59009                  | 5.00E-05       |
| ASB4                                 | 3.85217                  | 5.00E-05       |
| NKX3-2                               | 3.69844                  | 0.00025        |
| DSG4                                 | 3.54697                  | 0.0029         |
| MUC2                                 | 3.52932                  | 5.00E-05       |
| CD34                                 | 3.3625                   | 0.00035        |
| AFP                                  | 3.25741                  | 5.00E-05       |
| GCNT3                                | 3.25196                  | 5.00E-05       |
| B3GNT6                               | 3.23074                  | 0.0001         |
| <b>Up-regulated Inhibitory genes</b> | <b>log2(fold-change)</b> | <b>p_value</b> |
| ALDH1A2                              | 3.01225                  | 5.00E-05       |
| TFF1                                 | 3.00824                  | 0.00115        |
| ABCB5                                | 2.83042                  | 0.0029         |
| GJB6                                 | 2.65629                  | 0.00015        |
| KRT4                                 | 2.58442                  | 5.00E-05       |
| PKHD1                                | 2.49082                  | 5.00E-05       |
| ALDH1A3                              | 2.48333                  | 0.00075        |
| WFDC1                                | 2.39754                  | 0.0001         |
| OGN                                  | 2.20641                  | 0.00165        |
| RERG                                 | 2.11802                  | 5.00E-05       |

**eTable 4. Excitatory and inhibitory genes: Down-regulated DEGs.** List of top ten significantly down-regulated genes that are primarily expressed in excitatory and inhibitory neurons, listed according to significance (*p* value)

| Down-regulated Excitatory genes log <sub>2</sub> (fold-change) p_value |          |          |
|------------------------------------------------------------------------|----------|----------|
| GLRA3                                                                  | -4.57526 | 0.00055  |
| SMOC1                                                                  | -3.88093 | 0.00015  |
| ST8SIA5                                                                | -3.27257 | 0.00135  |
| BAIAP3                                                                 | -3.08113 | 0.0036   |
| SLCO1C1                                                                | -3.01626 | 5.00E-05 |
| MGAT4C                                                                 | -2.97603 | 5.00E-05 |
| CA3                                                                    | -2.93028 | 0.00095  |
| AQP4                                                                   | -2.89686 | 0.00045  |
| GPR17                                                                  | -2.8276  | 0.0057   |
| MLC1                                                                   | -2.77549 | 5.00E-05 |
| Down-regulated Inhibitory genes log <sub>2</sub> (fold-change) p_value |          |          |
| PSD2                                                                   | -3.52559 | 5.00E-05 |
| SNTG2                                                                  | -3.10909 | 5.00E-05 |
| FOXP1                                                                  | -3.1037  | 5.00E-05 |
| SEMA5B                                                                 | -3.08829 | 5.00E-05 |
| MYT1L                                                                  | -2.97149 | 0.0002   |
| MDGA2                                                                  | -2.81431 | 5.00E-05 |
| ASTN1                                                                  | -2.72078 | 5.00E-05 |
| POU3F3                                                                 | -2.71539 | 5.00E-05 |
| DPF1                                                                   | -2.63659 | 5.00E-05 |
| TTBK1                                                                  | -2.6163  | 0.0002   |

**eTable 5. Primary antibodies used**

| <b>Primary antibody</b>                 | <b>Type</b>                     | <b>Dilution</b> | <b>Source</b>           |
|-----------------------------------------|---------------------------------|-----------------|-------------------------|
| <b>Iba-1</b>                            | Goat polyclonal                 | 1/500           | Abcam                   |
| <b>GAD 67</b>                           | Mouse monoclonal                | 1/1000          | Abcam                   |
| <b>Glutamate Synthase</b>               | Rabbit polyclonal               | 1/10000         | Novus                   |
| <b>LHX6 (A-9)</b>                       | Mouse monoclonal                | 1/100           | Santa Cruz Biotechnolog |
| <b>MAP2</b>                             | Guinea pig polyclonal antiserum | 1/1000          | Synaptic Systems        |
| <b>Myelin Basic Protein</b>             | Mouse monoclonal                | 1/200           | Abcam                   |
| <b>Oligodendrocyte Specific Protein</b> | Rabbit polyclonal               | 1/200           | Abcam                   |
| <b>Somatostatin (Clone YC7)</b>         | Rat monoclonal                  | 1/100           | EMD Millipore Corp.     |
| <b>TBR2</b>                             | Rabbit polyclonal               | 1/200           | Abcam                   |

**eTable 6. KaryoSTAT code for each line.**

| <b><u>Control Lines</u></b>       |             |            |
|-----------------------------------|-------------|------------|
| <b>KaryoSTAT Labels</b>           | <b>Line</b> | <b>Sex</b> |
| CUB12899-8                        | ML22        | M          |
| CUB12899-9                        | ML15        | M          |
| CUB12899-10                       | ML51        | M          |
| CUB12899-11                       | ML135       | M          |
| CUB12899-12                       | ML292       | M          |
| CUB12899-18                       | ML27        | M          |
| CUB12899-21                       | ML300       | F          |
| CUB12899-22                       | ML56        | F          |
|                                   |             |            |
|                                   |             |            |
| <b><u>Schizophrenia lines</u></b> |             |            |
| <b>KaryoSTAT Labels</b>           | <b>Line</b> | <b>Sex</b> |
| CUB12899-1                        | ML123       | M          |
| CUB12899-2                        | ML67        | M          |
| CUB12899-3                        | ML233       | F          |
| CUB12899-17                       | ML141       | M          |
| CUB12899-20                       | ML250       | M          |
| CUB12899-23                       | ML40        | F          |
| CUB12899r-2                       | ML164       | F          |
| CUB12899-14                       | ML37        | F          |

# KaryoStat™ Results: CUB12899-12

1. KaryoStat™ analysis of CUB12899-12 revealed the sample originated from a male individual
2. No chromosomal aberrations were found when comparing against the reference dataset (Figure 21)

## Copy Number State

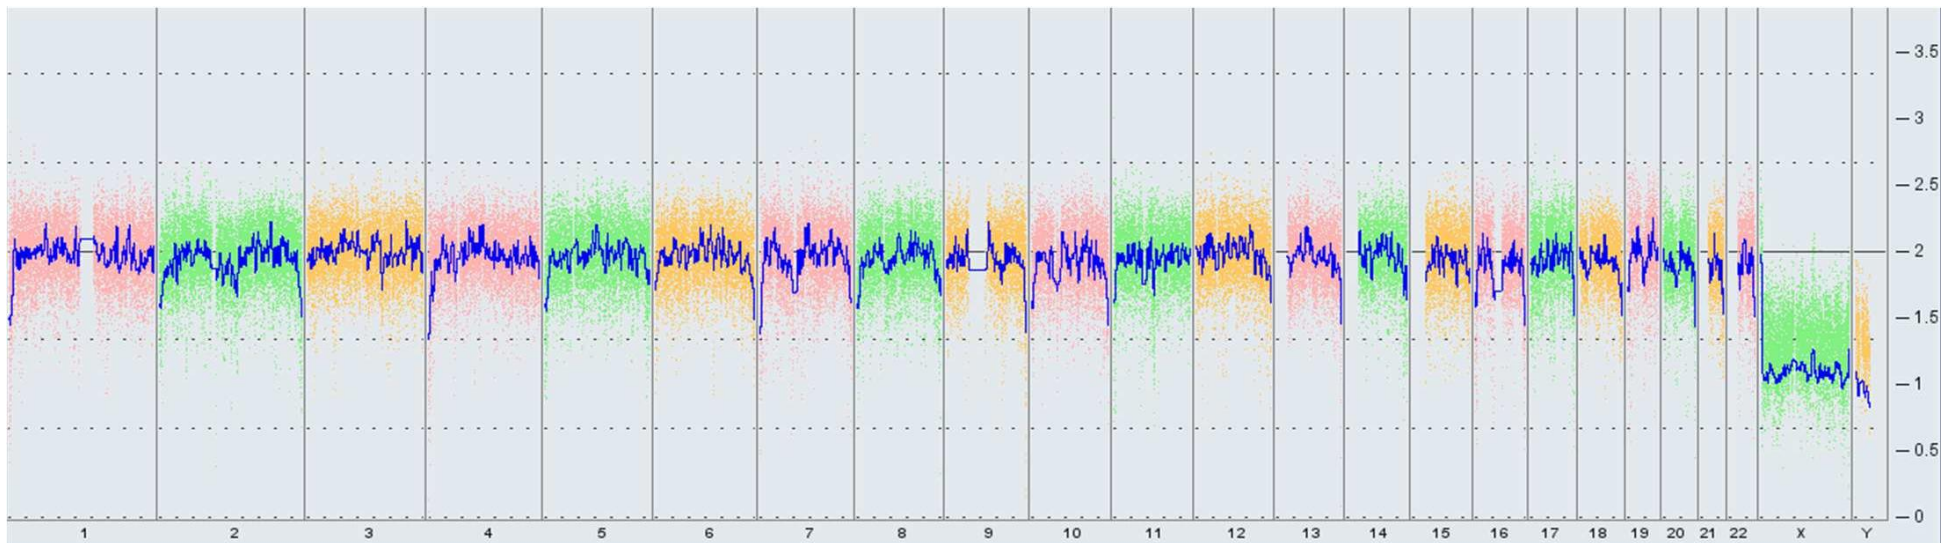

**Figure 21: Whole genome view.** The whole genome view displays all somatic and sex chromosomes in one frame with high level copy number. The smooth signal plot (right y-axis) is the smoothing of the log2 ratios which depict the signal intensities of probes on the microarray. A value of 2 represents a normal copy number state (CN = 2). A value of 3 represents chromosomal gain (CN = 3). A value of 1 represents a chromosomal loss (CN = 1). The pink, green and yellow colors indicate the raw signal for each individual chromosome probe, while the blue signal represents the normalized probe signal which is used to identify copy number and aberrations (if any).

*Disclaimer: This assay was conducted solely for the listed investigator/institution. The results of this assay are for research use only.*



# KaryoStat™ Results: CUB12899-18

1. KaryoStat™ analysis of CUB12899-18 revealed the sample originated from a male individual
2. No chromosomal aberrations were found when comparing against the reference dataset (Figure 10)

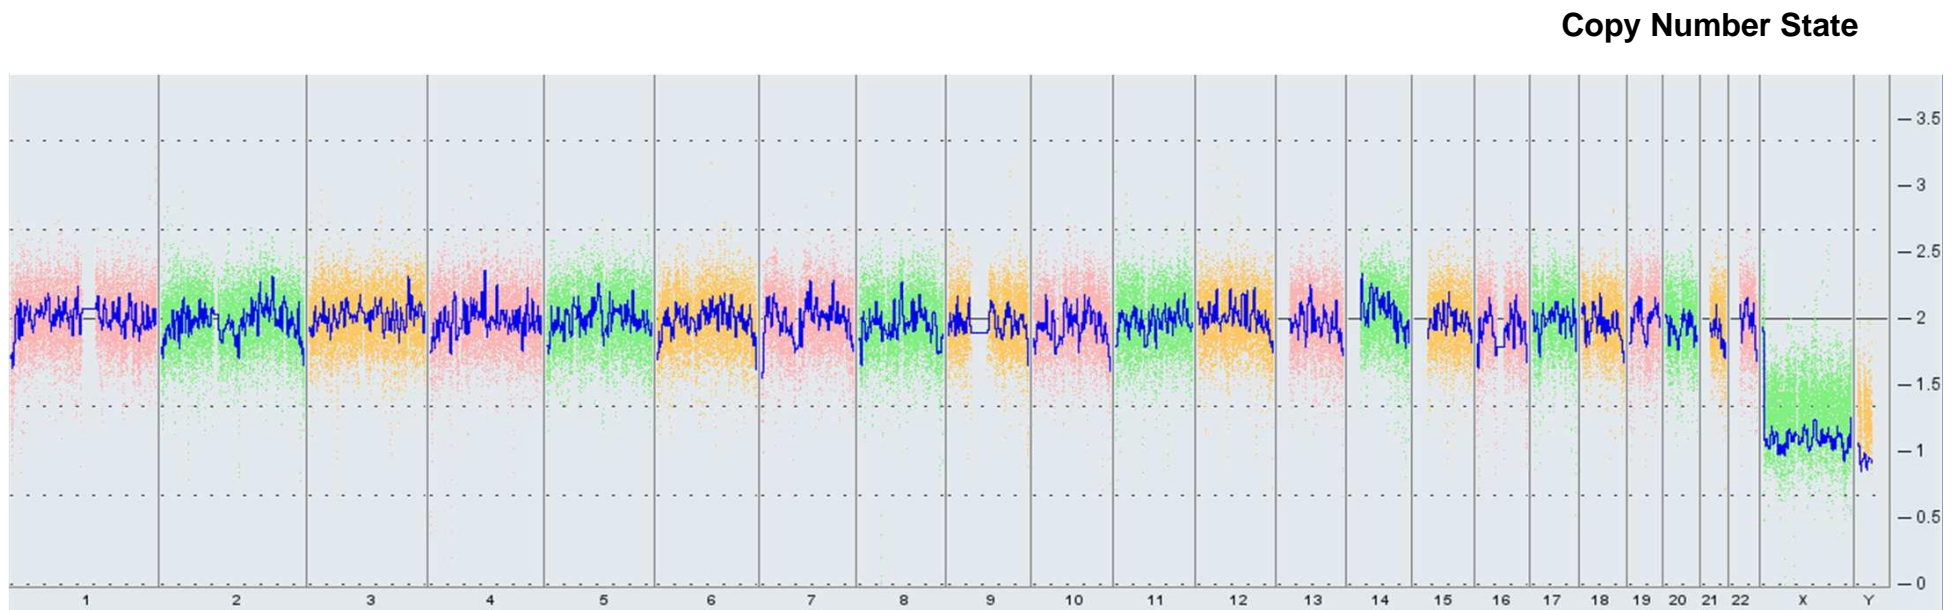

**Figure 10: Whole genome view.** The whole genome view displays all somatic and sex chromosomes in one frame with high level copy number. The smooth signal plot (right y-axis) is the smoothing of the log2 ratios which depict the signal intensities of probes on the microarray. A value of 2 represents a normal copy number state (CN = 2). A value of 3 represents chromosomal gain (CN = 3). A value of 1 represents a chromosomal loss (CN = 1). The pink, green and yellow colors indicate the raw signal for each individual chromosome probe, while the blue signal represents the normalized probe signal which is used to identify copy number and aberrations (if any).

*Disclaimer: This assay was conducted solely for the listed investigator/institution. The results of this assay are for research use only.*

# KaryoStat™ Results: CUB12899-9

1. KaryoStat™ analysis of CUB12899-9 revealed the sample originated from a male individual
2. No chromosomal aberrations were found when comparing against the reference dataset (Figure 4)

## Copy Number State

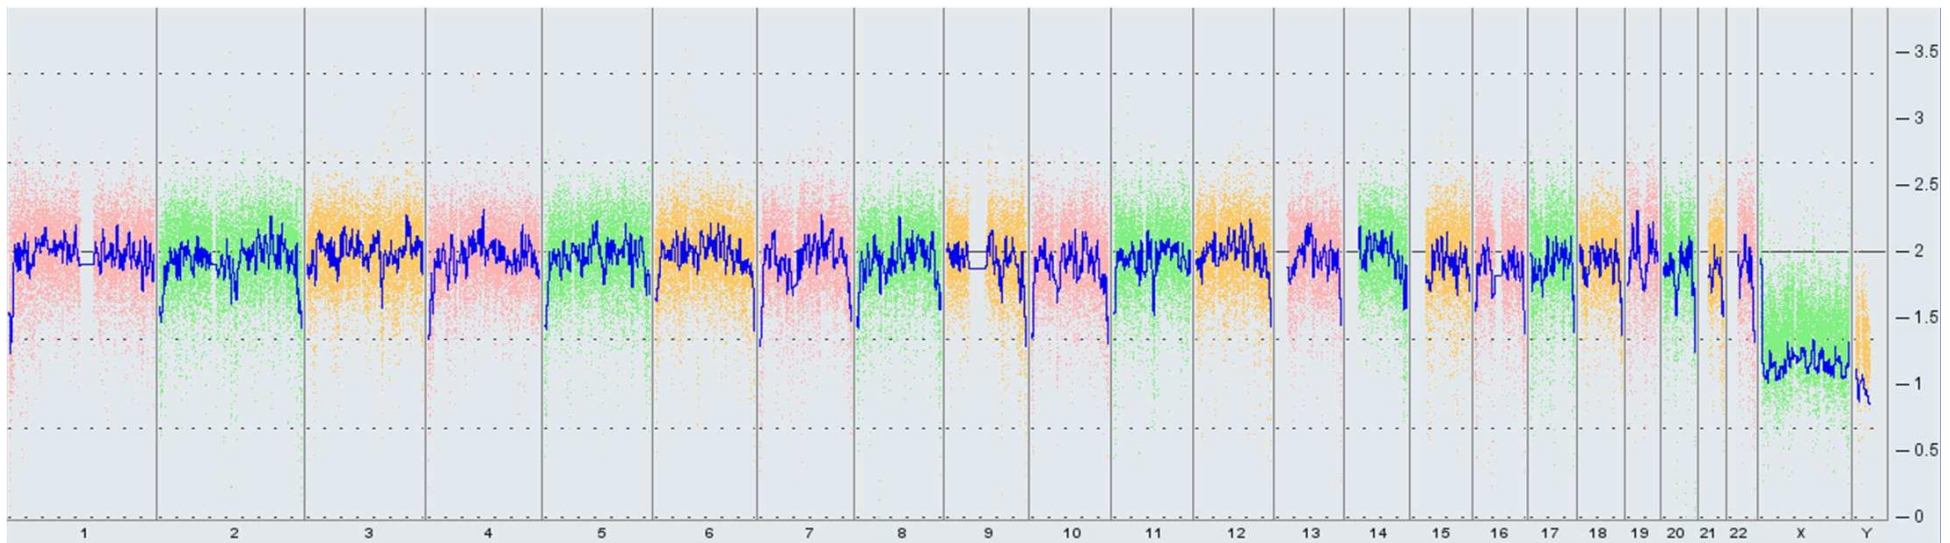

**Figure 4: Whole genome view.** The whole genome view displays all somatic and sex chromosomes in one frame with high level copy number. The smooth signal plot (right y-axis) is the smoothing of the log2 ratios which depict the signal intensities of probes on the microarray. A value of 2 represents a normal copy number state (CN = 2). A value of 3 represents chromosomal gain (CN = 3). A value of 1 represents a chromosomal loss (CN = 1). The pink, green and yellow colors indicate the raw signal for each individual chromosome probe, while the blue signal represents the normalized probe signal which is used to identify copy number and aberrations (if any).

*Disclaimer: This assay was conducted solely for the listed investigator/institution. The results of this assay are for research use only.*

# KaryoStat™ Results: CUB12899-10

1. KaryoStat™ analysis of CUB12899-10 revealed the sample originated from a male individual
2. No chromosomal aberrations were found when comparing against the reference dataset (Figure 5)

## Copy Number State

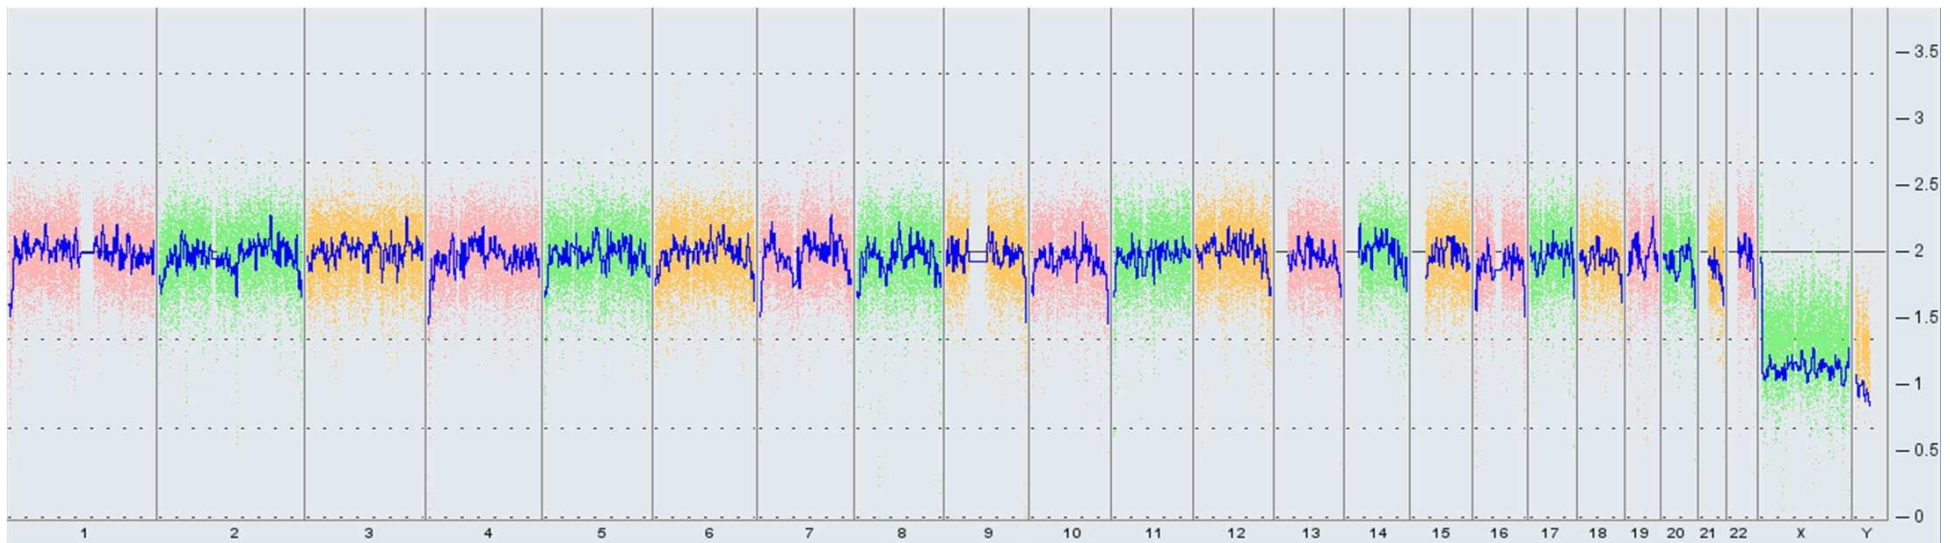

**Figure 5: Whole genome view.** The whole genome view displays all somatic and sex chromosomes in one frame with high level copy number. The smooth signal plot (right y-axis) is the smoothing of the log2 ratios which depict the signal intensities of probes on the microarray. A value of 2 represents a normal copy number state (CN = 2). A value of 3 represents chromosomal gain (CN = 3). A value of 1 represents a chromosomal loss (CN = 1). The pink, green and yellow colors indicate the raw signal for each individual chromosome probe, while the blue signal represents the normalized probe signal which is used to identify copy number and aberrations (if any).

*Disclaimer: This assay was conducted solely for the listed investigator/institution. The results of this assay are for research use only.*

# KaryoStat™ Results: CUB12899-11

1. KaryoStat™ analysis of CUB12899-11 revealed the sample originated from a male individual
2. No chromosomal aberrations were found when comparing against the reference dataset (Figure 6)

## Copy Number State

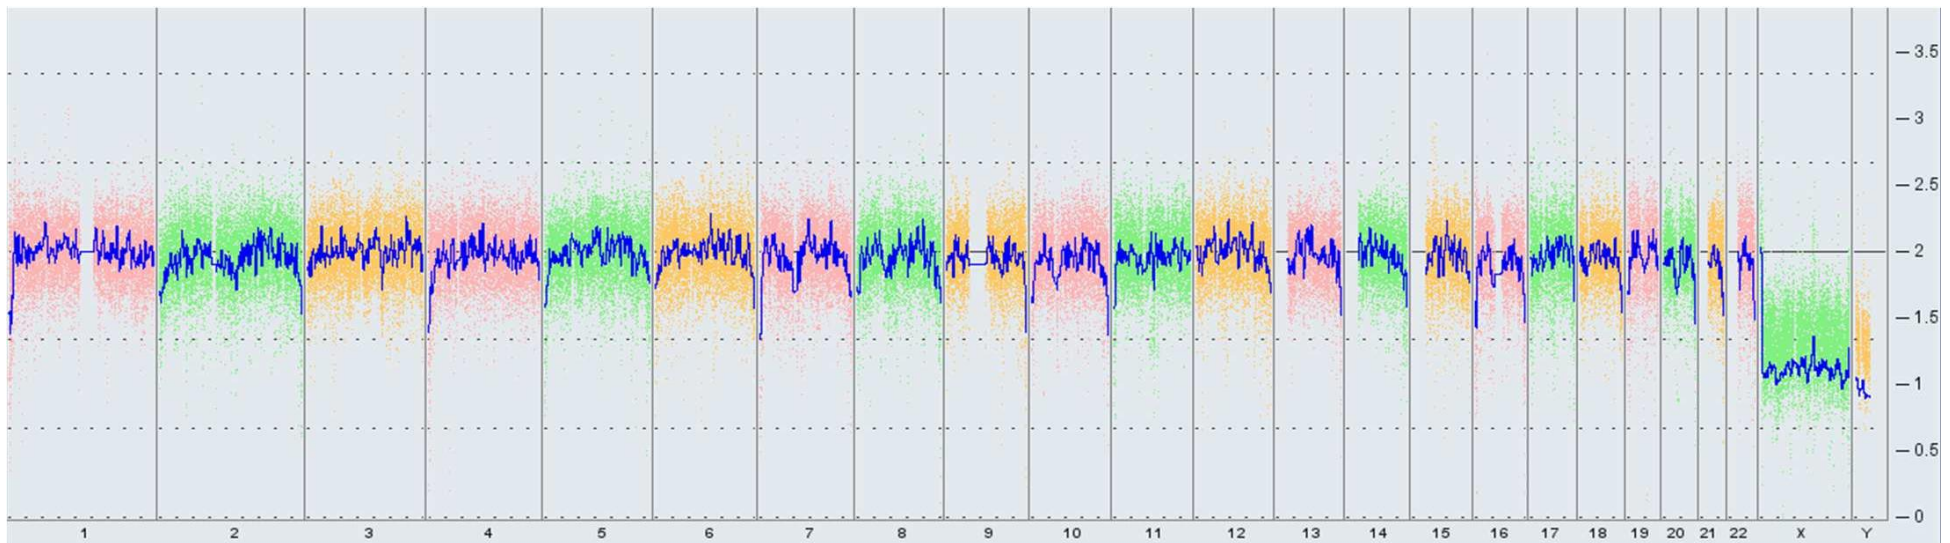

**Figure 6: Whole genome view.** The whole genome view displays all somatic and sex chromosomes in one frame with high level copy number. The smooth signal plot (right y-axis) is the smoothing of the log2 ratios which depict the signal intensities of probes on the microarray. A value of 2 represents a normal copy number state (CN = 2). A value of 3 represents chromosomal gain (CN = 3). A value of 1 represents a chromosomal loss (CN = 1). The pink, green and yellow colors indicate the raw signal for each individual chromosome probe, while the blue signal represents the normalized probe signal which is used to identify copy number and aberrations (if any).

*Disclaimer: This assay was conducted solely for the listed investigator/institution. The results of this assay are for research use only.*

# KaryoStat™ Results: CUB12899-8

1. KaryoStat™ analysis of CUB12899-8 revealed the sample originated from a male individual
2. Chromosomal aberrations were observed when comparing to the reference set (Table 3, Figure 3)
3. A supplemental document with detailed information on the aberration will be provided to the Client

| Chromosome | Type | Cytoband Start | CN State | Size (kbp) |
|------------|------|----------------|----------|------------|
| 2          | Gain | q33.2          | 3        | 2,618      |

**Table 3: KaryoStat™ analysis.** Chromosomal aberrations are indicated in the table shown. See supplemental data for more details.

**Copy Number State**

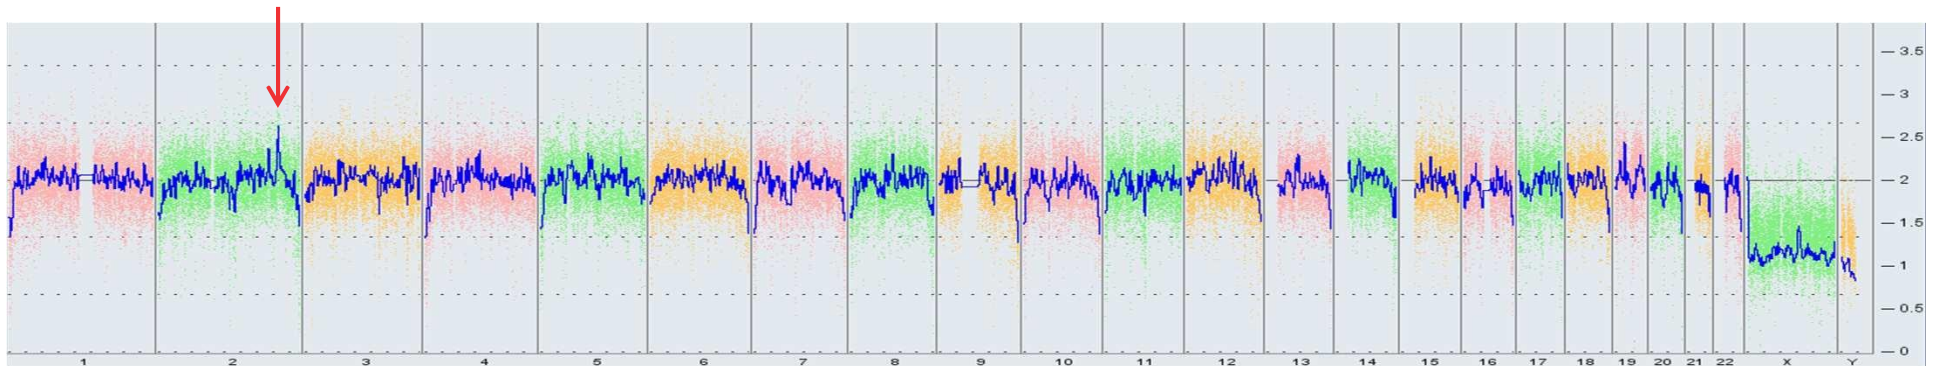

**Figure 3: Whole genome view.** The whole genome view displays all somatic and sex chromosomes in one frame with high level copy number. The smooth signal plot (right y-axis) is the smoothing of the log<sub>2</sub> ratios which depict the signal intensities of probes on the microarray. A value of 2 represents a normal copy number state (CN = 2). A value of 3 represents chromosomal gain (CN = 3). A value of 1 represents a chromosomal loss (CN = 1). The pink, green and yellow colors indicate the raw signal for each individual chromosome probe, while the blue signal represents the normalized probe signal which is used to identify copy number and aberrations (if any). The whole genome view analysis revealed chromosomal aberrations indicated by the red arrow.

*Disclaimer: This assay was conducted solely for the listed investigator/institution. The results of this assay are for research use only.*

# KaryoStat™ Results: CUB12899-21

1. KaryoStat™ analysis of CUB12899-21 revealed the sample originated from a female individual
2. No chromosomal aberrations were found when comparing against the reference dataset (Figure 22)

## Copy Number State

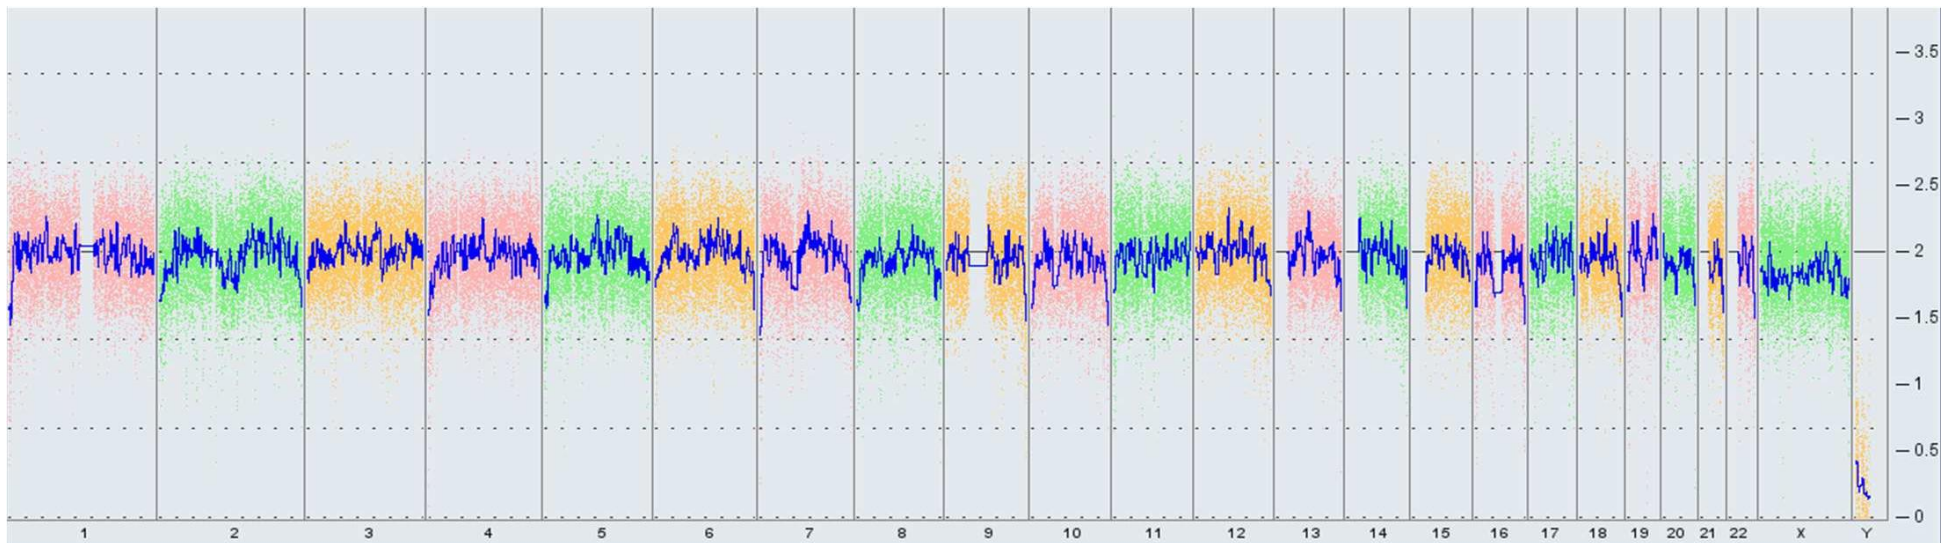

**Figure 22: Whole genome view.** The whole genome view displays all somatic and sex chromosomes in one frame with high level copy number. The smooth signal plot (right y-axis) is the smoothing of the log<sub>2</sub> ratios which depict the signal intensities of probes on the microarray. A value of 2 represents a normal copy number state (CN = 2). A value of 3 represents chromosomal gain (CN = 3). A value of 1 represents a chromosomal loss (CN = 1). The pink, green and yellow colors indicate the raw signal for each individual chromosome probe, while the blue signal represents the normalized probe signal which is used to identify copy number and aberrations (if any).

*Disclaimer: This assay was conducted solely for the listed investigator/institution. The results of this assay are for research use only.*

# KaryoStat™ Results: CUB12899-22

1. KaryoStat™ analysis of CUB12899-22 revealed the sample originated from a female individual
2. No chromosomal aberrations were found when comparing against the reference dataset (Figure 23)

## Copy Number State

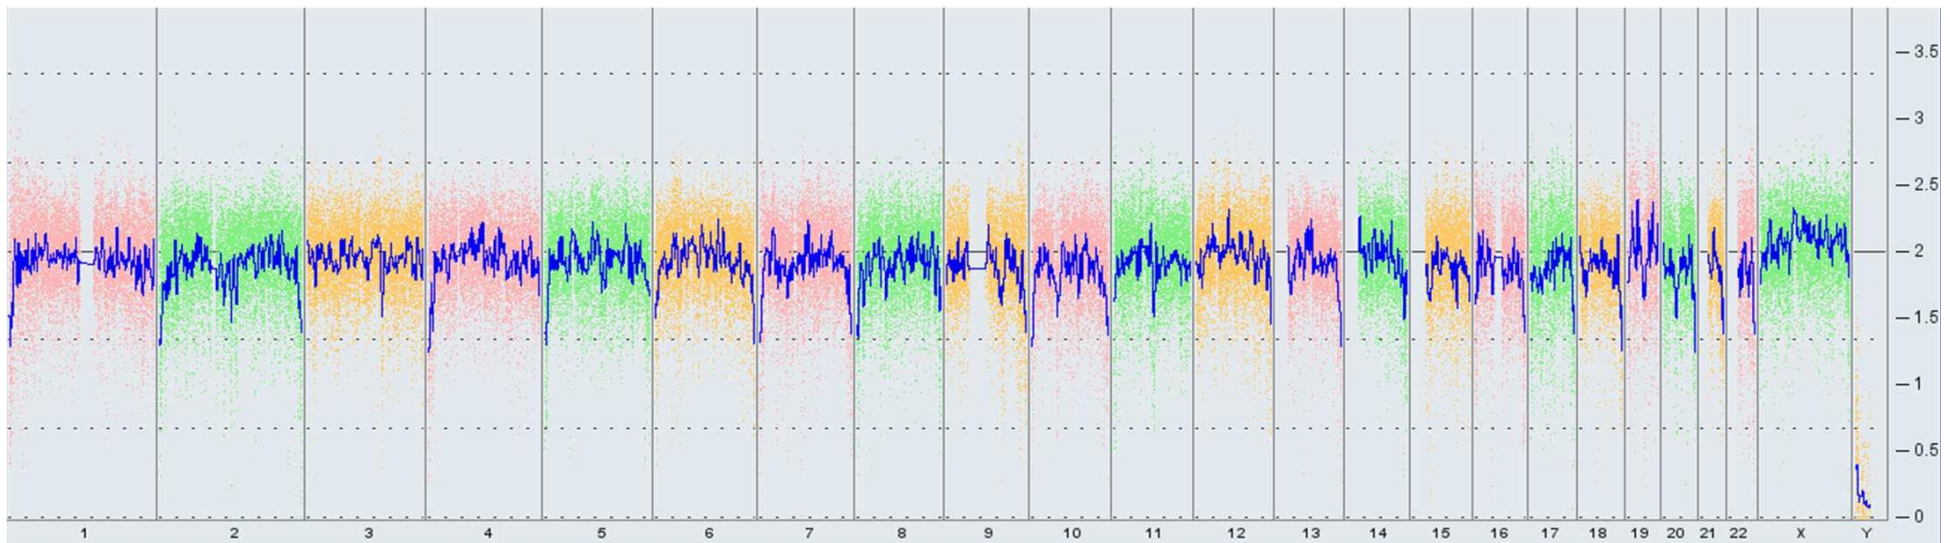

**Figure 23: Whole genome view.** The whole genome view displays all somatic and sex chromosomes in one frame with high level copy number. The smooth signal plot (right y-axis) is the smoothing of the log<sub>2</sub> ratios which depict the signal intensities of probes on the microarray. A value of 2 represents a normal copy number state (CN = 2). A value of 3 represents chromosomal gain (CN = 3). A value of 1 represents a chromosomal loss (CN = 1). The pink, green and yellow colors indicate the raw signal for each individual chromosome probe, while the blue signal represents the normalized probe signal which is used to identify copy number and aberrations (if any).

*Disclaimer: This assay was conducted solely for the listed investigator/institution. The results of this assay are for research use only.*

# KaryoStat™ Results: CUB12899-1

1. KaryoStat™ analysis of CUB12899-1 revealed the sample originated from a male individual
2. Chromosomal aberrations were observed when comparing to the reference set (Table 5, Figure 18)
3. A supplemental document with detailed information on the aberration will be provided to the Client

| Chromosome | Type | Cytoband Start | CN State | Size (kbp) |
|------------|------|----------------|----------|------------|
| 12         | Gain | p13.33         | 3        | 6,947      |

**Table 5: KaryoStat™ analysis.** Chromosomal aberrations are indicated in the table shown. See supplemental data for more details.

**Copy Number State**

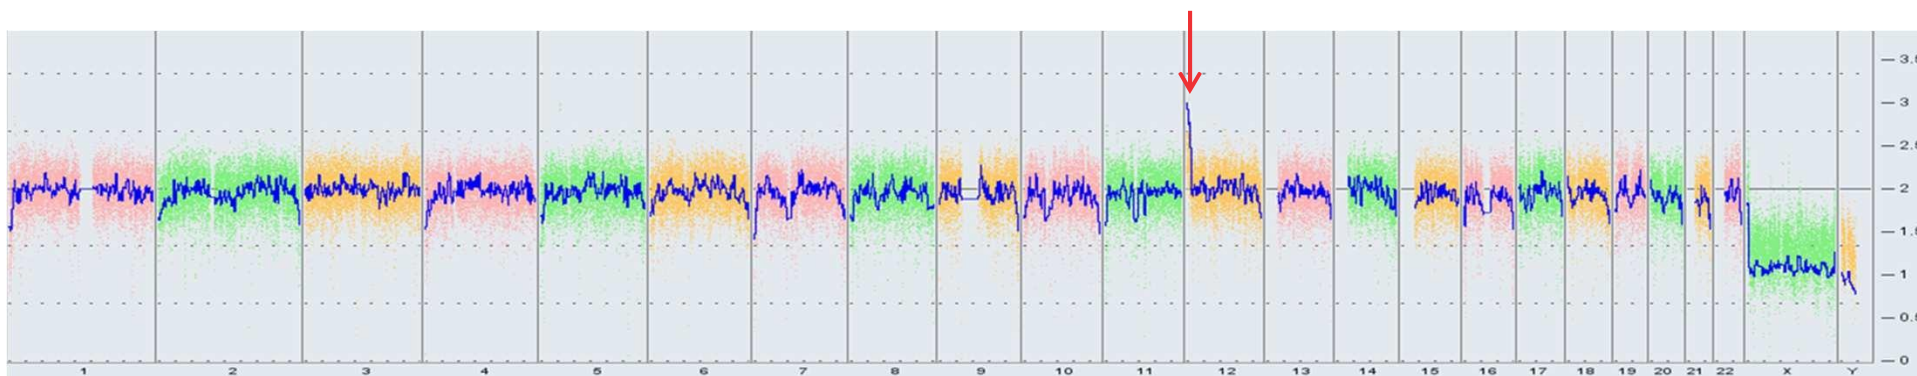

**Figure 18: Whole genome view.** The whole genome view displays all somatic and sex chromosomes in one frame with high level copy number. The smooth signal plot (right y-axis) is the smoothing of the log2 ratios which depict the signal intensities of probes on the microarray. A value of 2 represents a normal copy number state (CN = 2). A value of 3 represents chromosomal gain (CN = 3). A value of 1 represents a chromosomal loss (CN = 1). The pink, green and yellow colors indicate the raw signal for each individual chromosome probe, while the blue signal represents the normalized probe signal which is used to identify copy number and aberrations (if any). The whole genome view analysis revealed chromosomal aberrations indicated by the red arrow.

*Disclaimer: This assay was conducted solely for the listed investigator/institution. The results of this assay are for research use only.*



# KaryoStat™ Results: CUB12899-2

1. KaryoStat™ analysis of CUB12899-2 revealed the sample originated from a male individual
2. No chromosomal aberrations were found when comparing against the reference dataset (Figure 19)

## Copy Number State

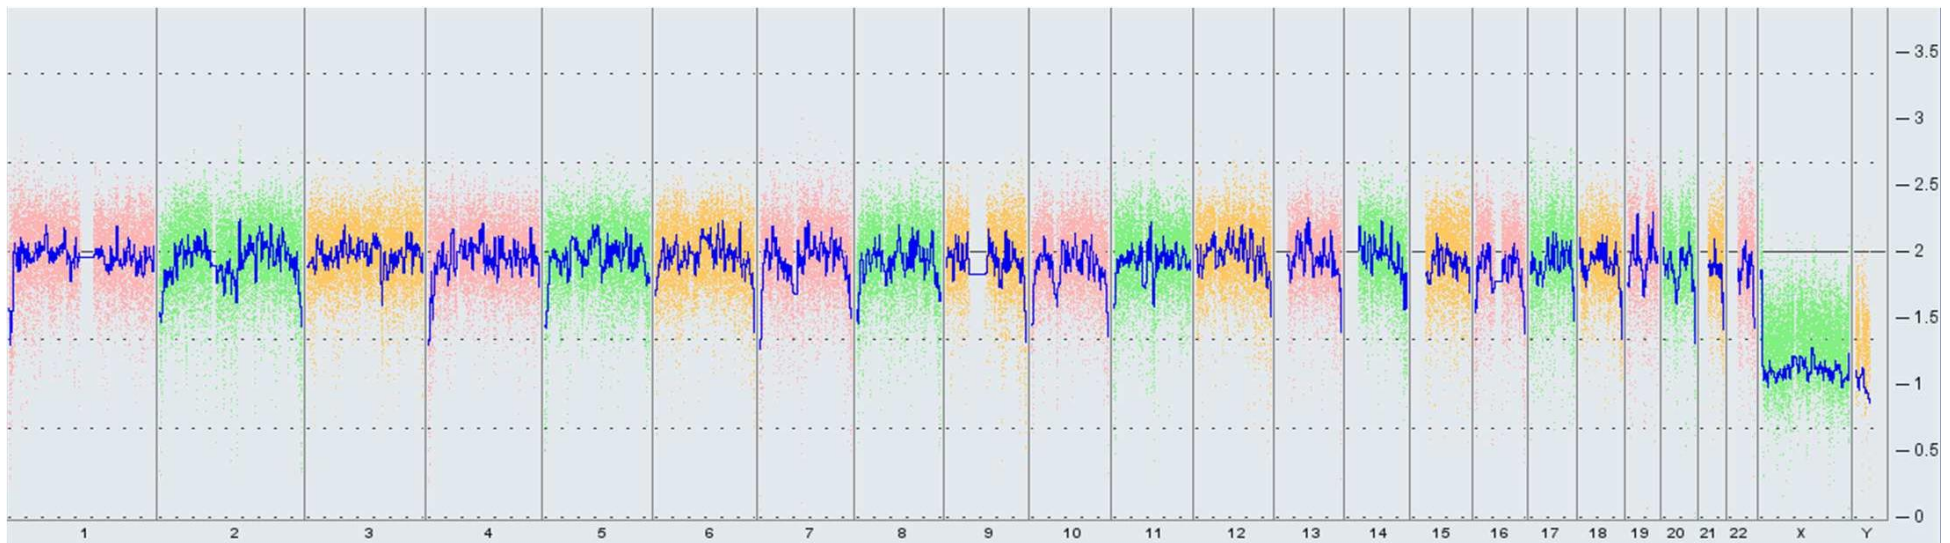

**Figure 19: Whole genome view.** The whole genome view displays all somatic and sex chromosomes in one frame with high level copy number. The smooth signal plot (right y-axis) is the smoothing of the log<sub>2</sub> ratios which depict the signal intensities of probes on the microarray. A value of 2 represents a normal copy number state (CN = 2). A value of 3 represents chromosomal gain (CN = 3). A value of 1 represents a chromosomal loss (CN = 1). The pink, green and yellow colors indicate the raw signal for each individual chromosome probe, while the blue signal represents the normalized probe signal which is used to identify copy number and aberrations (if any).

*Disclaimer: This assay was conducted solely for the listed investigator/institution. The results of this assay are for research use only.*

# KaryoStat™ Results: CUB12899-3

1. KaryoStat™ analysis of CUB12899-3 revealed the sample originated from a female individual
2. No chromosomal aberrations were found when comparing against the reference dataset (Figure 20)

## Copy Number State

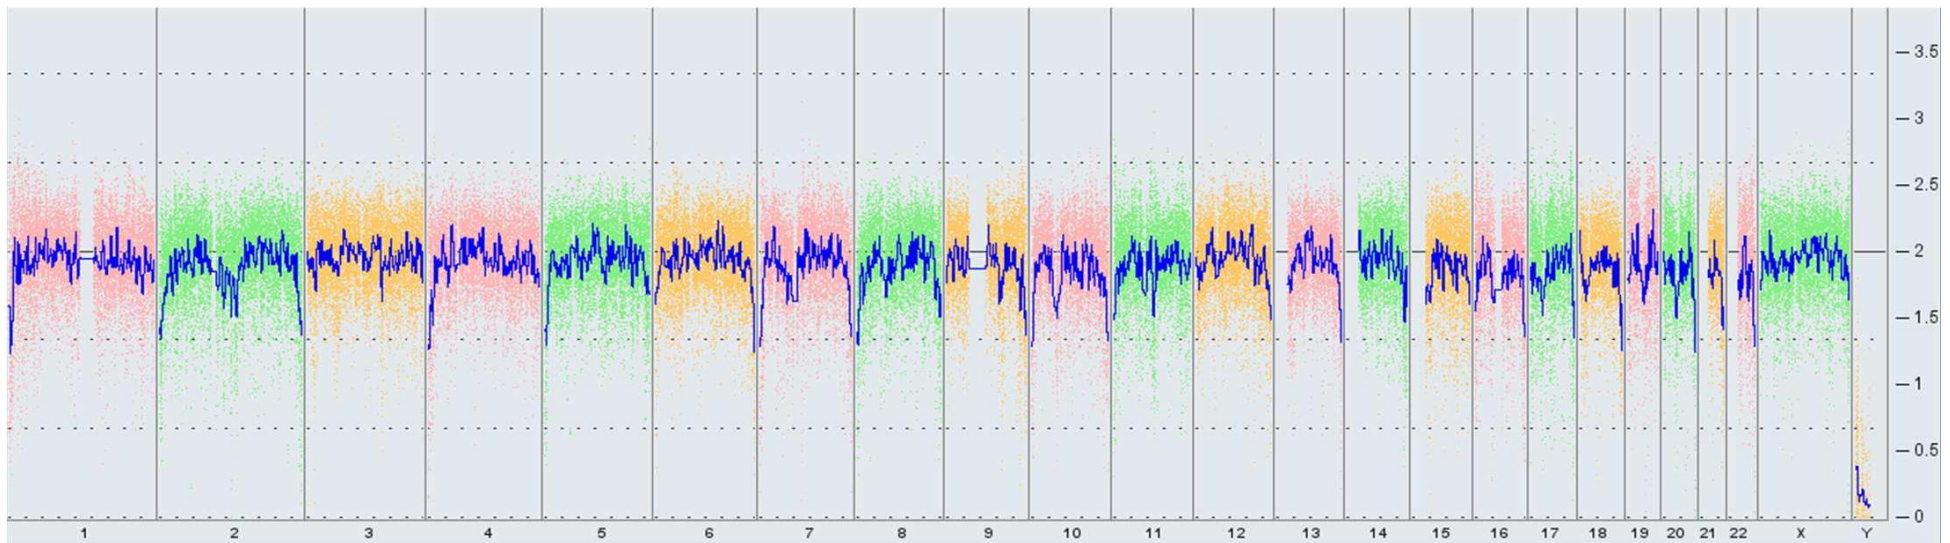

**Figure 20: Whole genome view.** The whole genome view displays all somatic and sex chromosomes in one frame with high level copy number. The smooth signal plot (right y-axis) is the smoothing of the log2 ratios which depict the signal intensities of probes on the microarray. A value of 2 represents a normal copy number state (CN = 2). A value of 3 represents chromosomal gain (CN = 3). A value of 1 represents a chromosomal loss (CN = 1). The pink, green and yellow colors indicate the raw signal for each individual chromosome probe, while the blue signal represents the normalized probe signal which is used to identify copy number and aberrations (if any).

*Disclaimer: This assay was conducted solely for the listed investigator/institution. The results of this assay are for research use only.*

# KaryoStat™ Results: CUB12899-14

1. KaryoStat™ analysis of CUB12899-14 revealed the sample originated from a female individual
2. No chromosomal aberrations were found when comparing against the reference dataset (Figure 7)

## Copy Number State

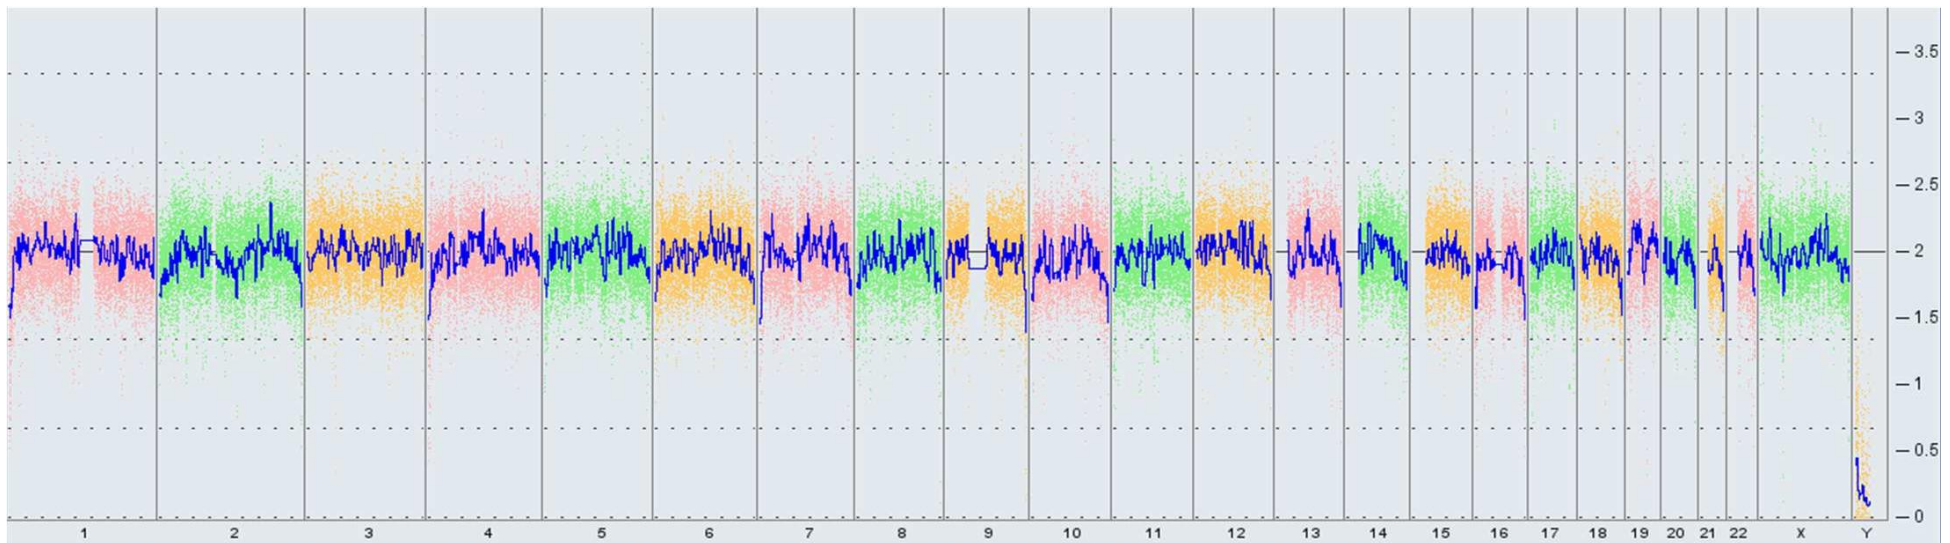

**Figure 7: Whole genome view.** The whole genome view displays all somatic and sex chromosomes in one frame with high level copy number. The smooth signal plot (right y-axis) is the smoothing of the log<sub>2</sub> ratios which depict the signal intensities of probes on the microarray. A value of 2 represents a normal copy number state (CN = 2). A value of 3 represents chromosomal gain (CN = 3). A value of 1 represents a chromosomal loss (CN = 1). The pink, green and yellow colors indicate the raw signal for each individual chromosome probe, while the blue signal represents the normalized probe signal which is used to identify copy number and aberrations (if any).

*Disclaimer: This assay was conducted solely for the listed investigator/institution. The results of this assay are for research use only.*

# KaryoStat™ Results: CUB12899-17

1. KaryoStat™ analysis of CUB12899-17 revealed the sample originated from a male individual
2. No chromosomal aberrations were found when comparing against the reference dataset (Figure 9)

## Copy Number State

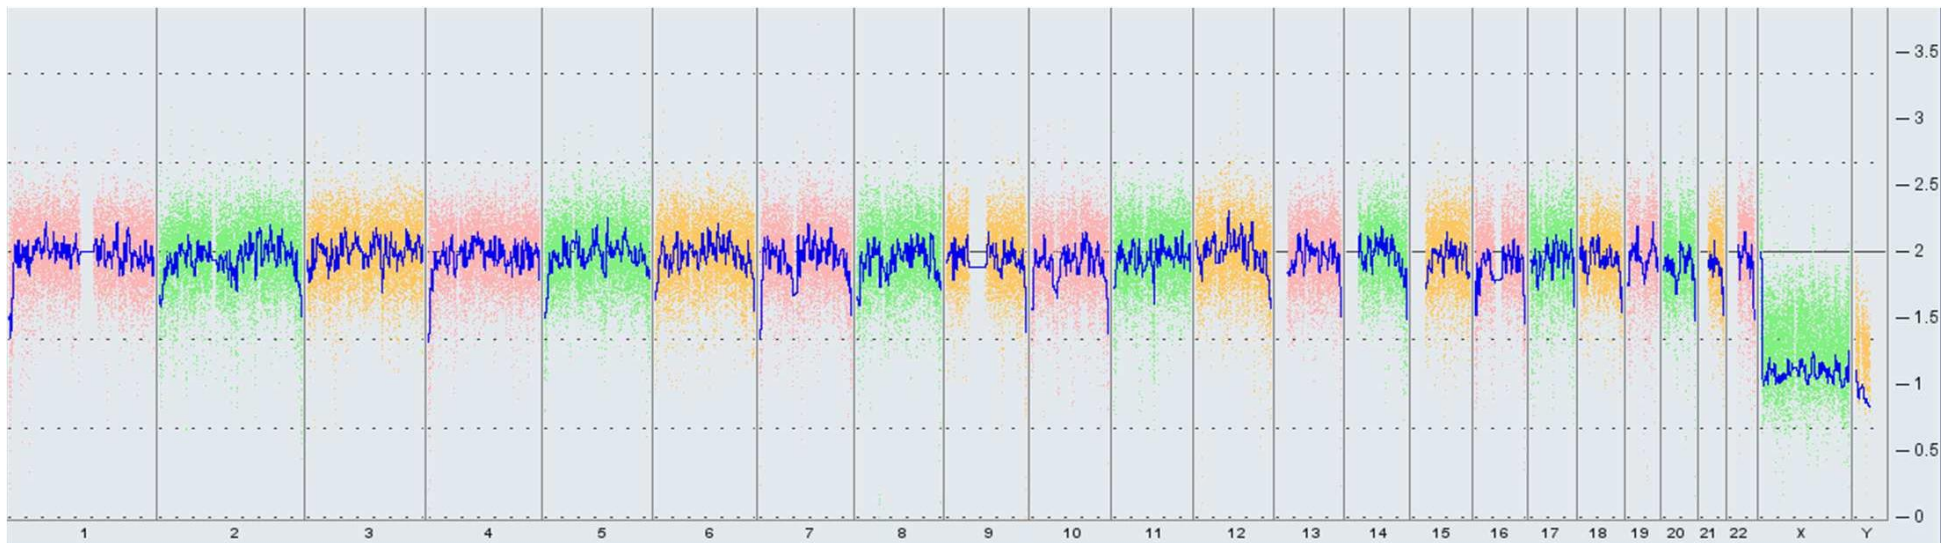

**Figure 9: Whole genome view.** The whole genome view displays all somatic and sex chromosomes in one frame with high level copy number. The smooth signal plot (right y-axis) is the smoothing of the log2 ratios which depict the signal intensities of probes on the microarray. A value of 2 represents a normal copy number state (CN = 2). A value of 3 represents chromosomal gain (CN = 3). A value of 1 represents a chromosomal loss (CN = 1). The pink, green and yellow colors indicate the raw signal for each individual chromosome probe, while the blue signal represents the normalized probe signal which is used to identify copy number and aberrations (if any).

*Disclaimer: This assay was conducted solely for the listed investigator/institution. The results of this assay are for research use only.*

# KaryoStat™ Results: CUB12899-20

1. KaryoStat™ analysis of CUB12899-20 revealed the sample originated from a male individual
2. No chromosomal aberrations were found when comparing against the reference dataset (Figure 12)

## Copy Number State

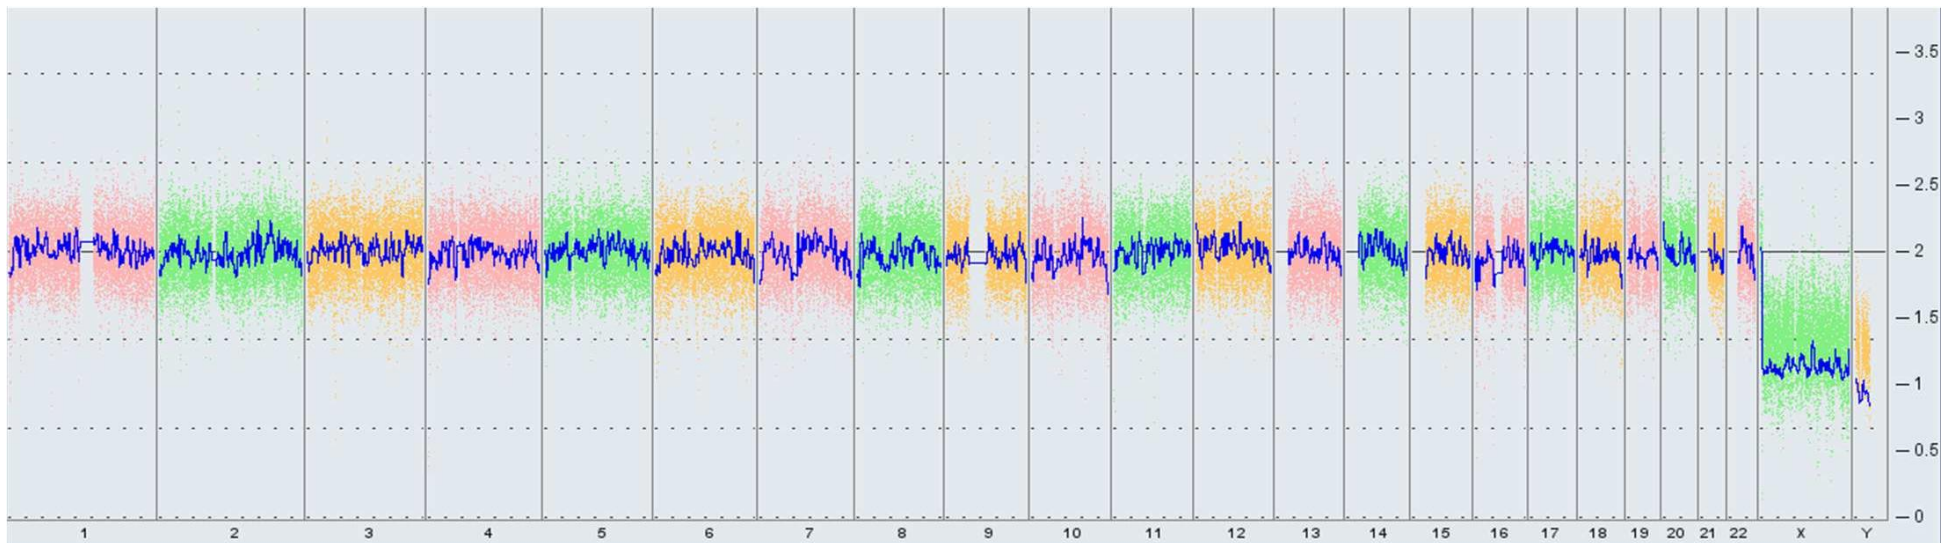

**Figure 12: Whole genome view.** The whole genome view displays all somatic and sex chromosomes in one frame with high level copy number. The smooth signal plot (right y-axis) is the smoothing of the log<sub>2</sub> ratios which depict the signal intensities of probes on the microarray. A value of 2 represents a normal copy number state (CN = 2). A value of 3 represents chromosomal gain (CN = 3). A value of 1 represents a chromosomal loss (CN = 1). The pink, green and yellow colors indicate the raw signal for each individual chromosome probe, while the blue signal represents the normalized probe signal which is used to identify copy number and aberrations (if any).

*Disclaimer: This assay was conducted solely for the listed investigator/institution. The results of this assay are for research use only.*

# KaryoStat™ Results: CUB12899-23

1. KaryoStat™ analysis of CUB12899-23 revealed the sample originated from a female individual
2. No chromosomal aberrations were found when comparing against the reference dataset (Figure 13)

## Copy Number State

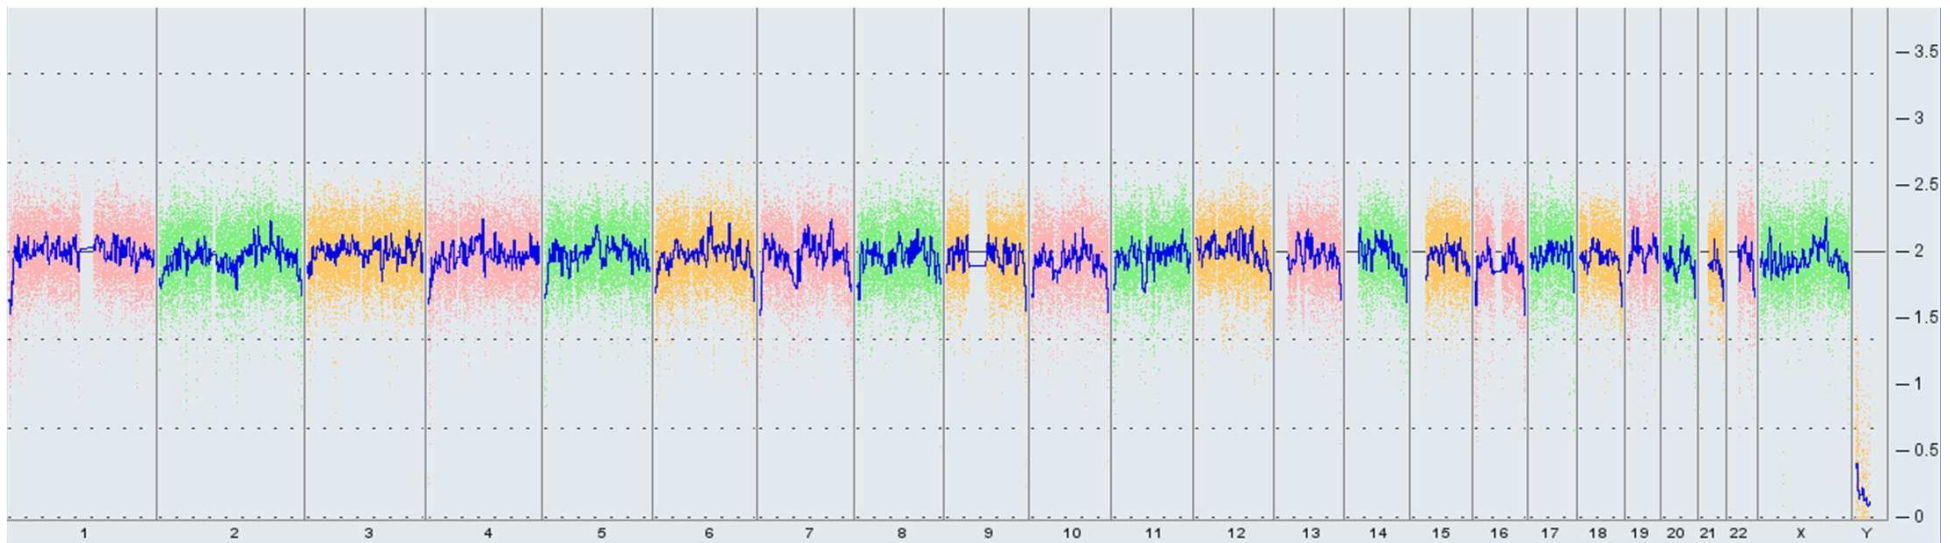

**Figure 13: Whole genome view.** The whole genome view displays all somatic and sex chromosomes in one frame with high level copy number. The smooth signal plot (right y-axis) is the smoothing of the log<sub>2</sub> ratios which depict the signal intensities of probes on the microarray. A value of 2 represents a normal copy number state (CN = 2). A value of 3 represents chromosomal gain (CN = 3). A value of 1 represents a chromosomal loss (CN = 1). The pink, green and yellow colors indicate the raw signal for each individual chromosome probe, while the blue signal represents the normalized probe signal which is used to identify copy number and aberrations (if any).

*Disclaimer: This assay was conducted solely for the listed investigator/institution. The results of this assay are for research use only.*

# KaryoStat™ Results: CUB12899r-2

1. KaryoStat™ analysis of CUB12899r-2 revealed the sample originated from a female individual
2. No chromosomal aberrations were found when comparing against the reference dataset (Figure 2)

## Copy Number State

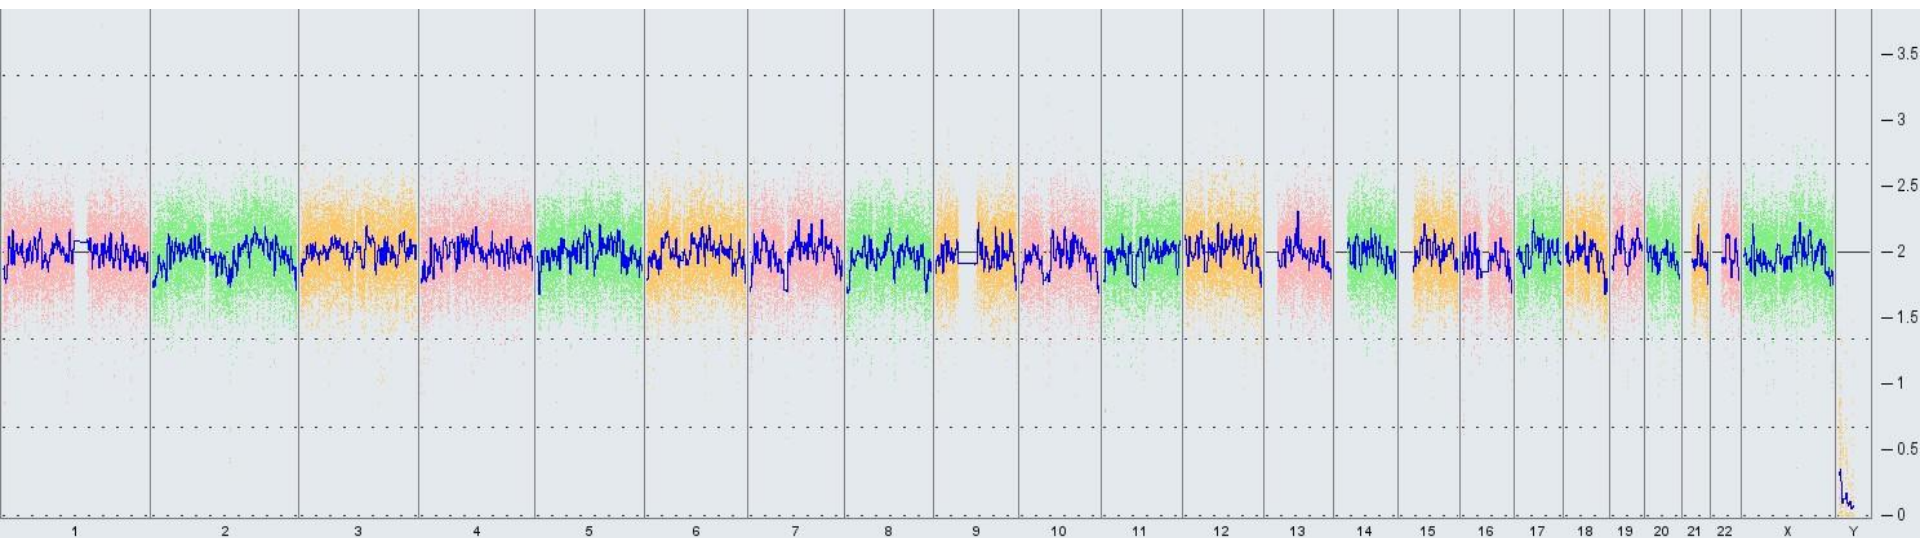

**Figure 2: Whole genome view.** The whole genome view displays all somatic and sex chromosomes in one frame with high level copy number. The smooth signal plot (right y-axis) is the smoothing of the log<sub>2</sub> ratios which depict the signal intensities of probes on the microarray. A value of 2 represents a normal copy number state (CN = 2). A value of 3 represents chromosomal gain (CN = 3). A value of 1 represents a chromosomal loss (CN = 1). The pink, green and yellow colors indicate the raw signal for each individual chromosome probe, while the blue signal represents the normalized probe signal which is used to identify copy number and aberrations (if any).

*Disclaimer: This assay was conducted solely for the listed investigator/institution. The results of this assay are for research use only.*

ML15

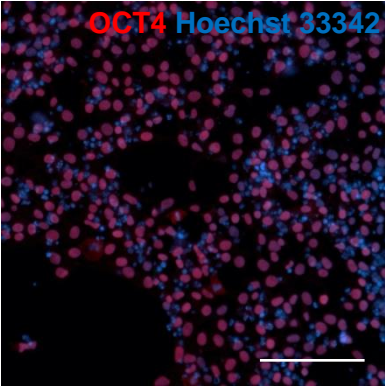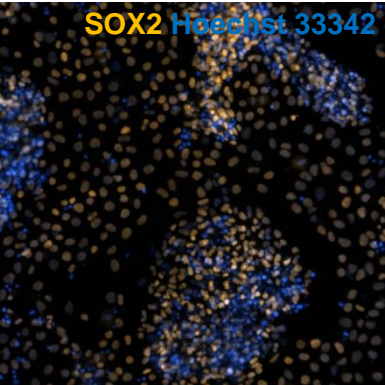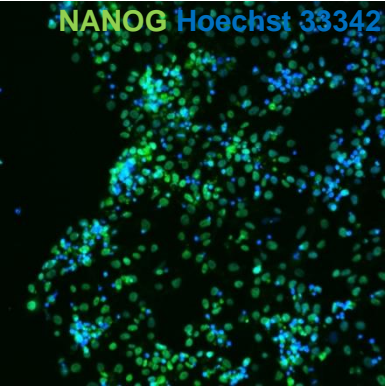

ML37

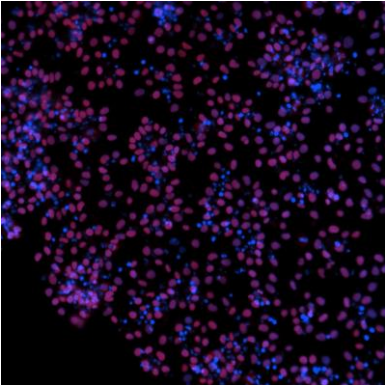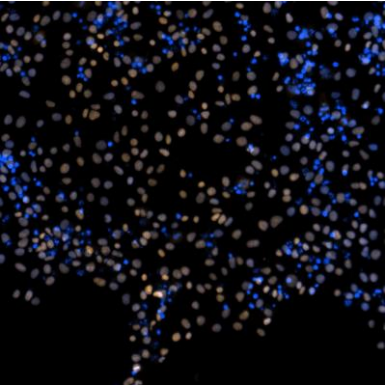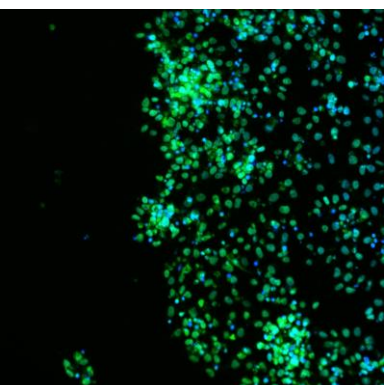

ML51

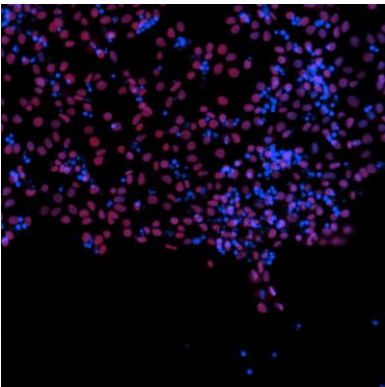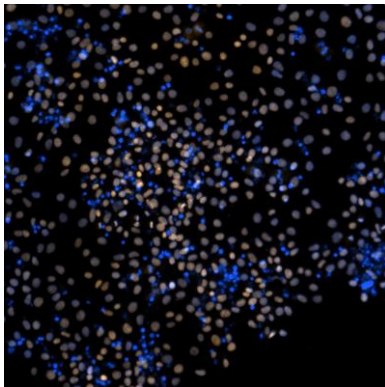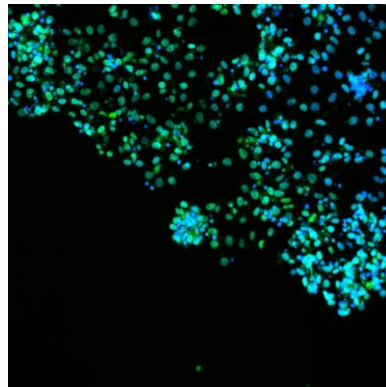



ML22

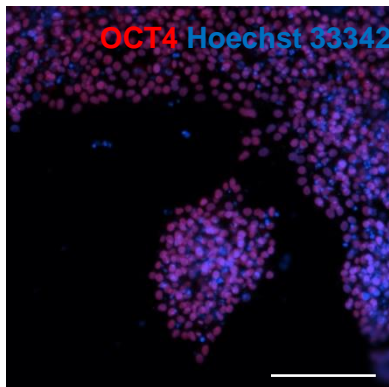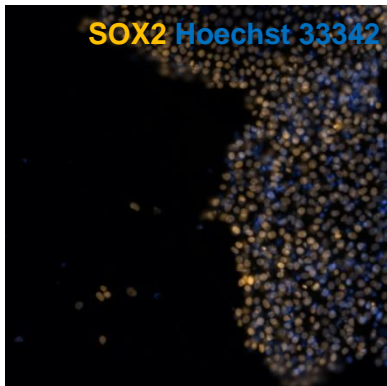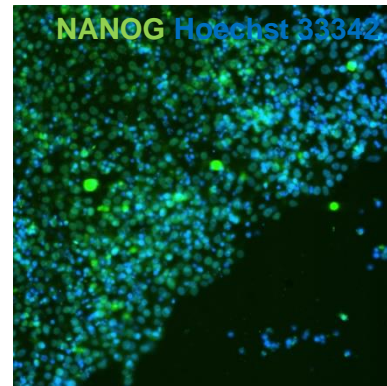

ML27

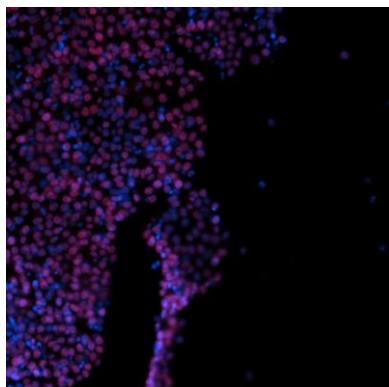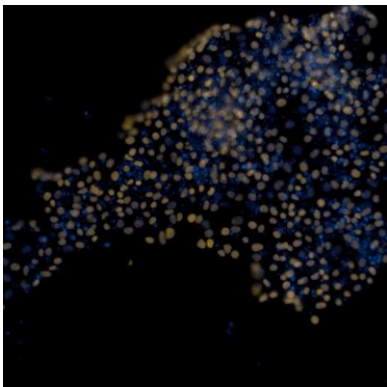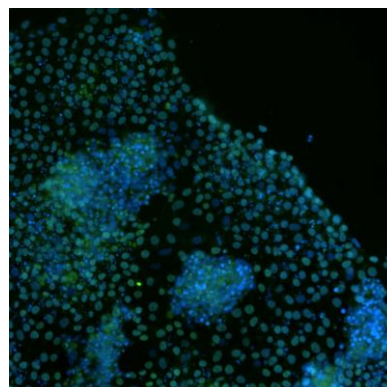

ML67

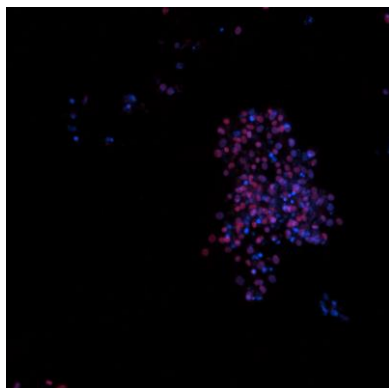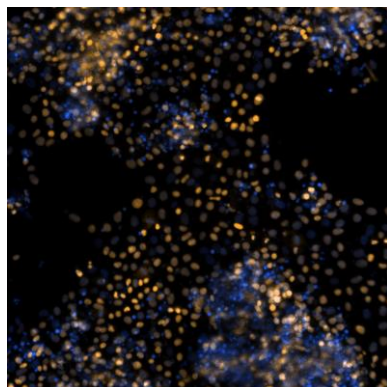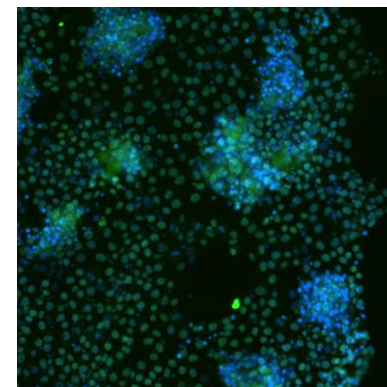

ML135

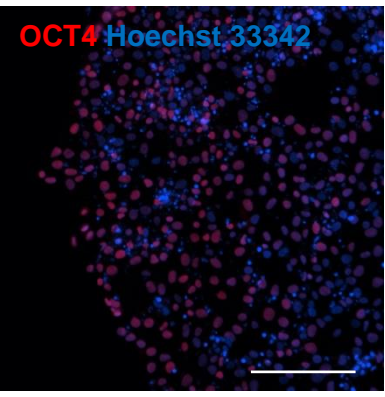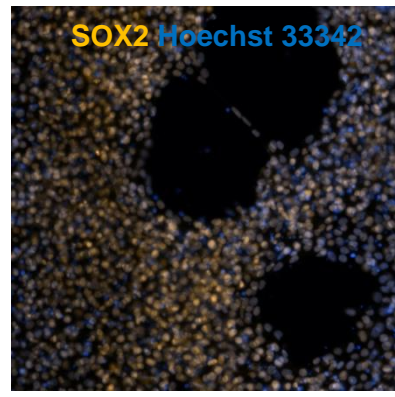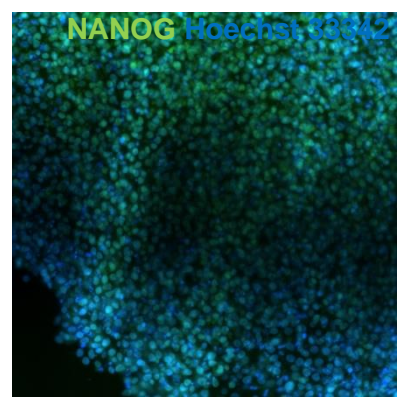

ML141

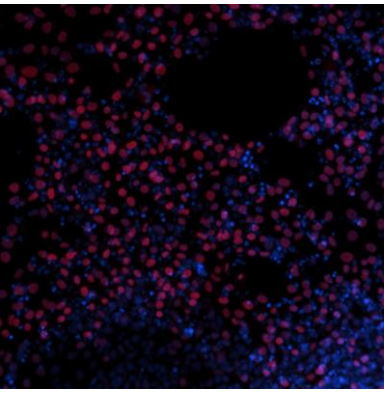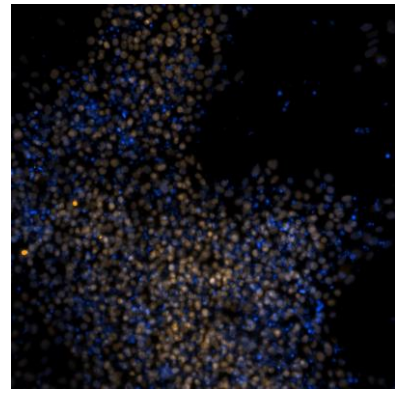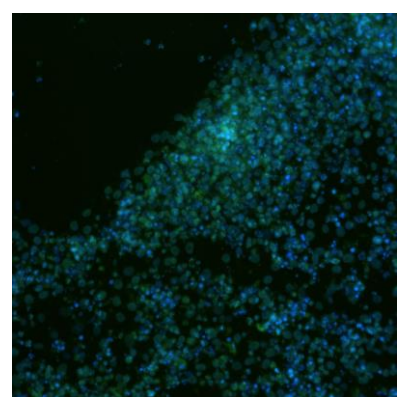

ML250

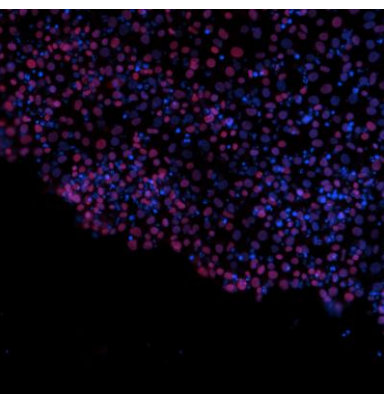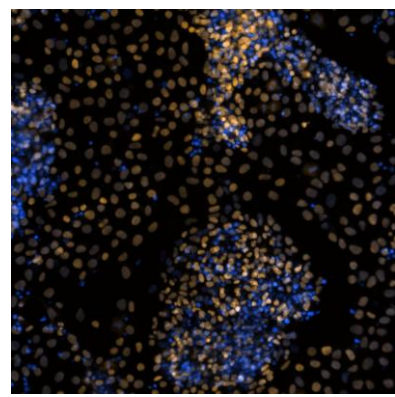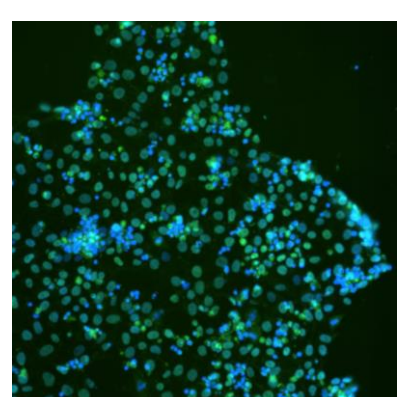

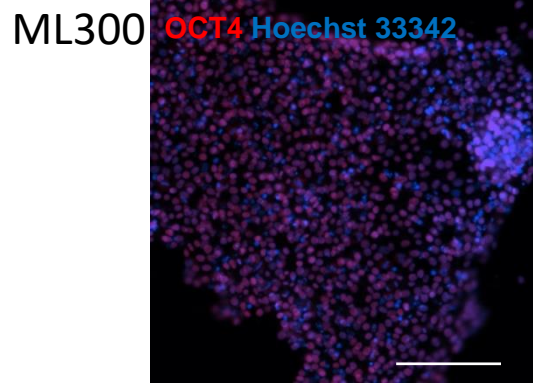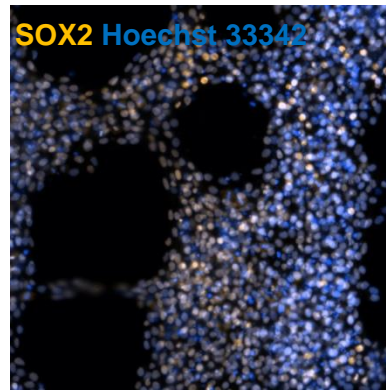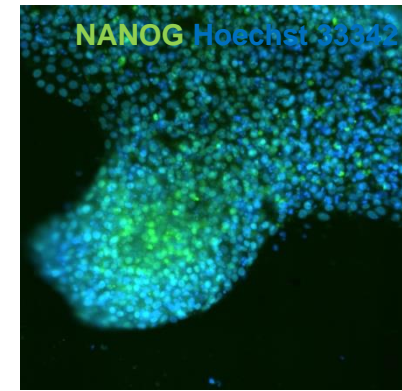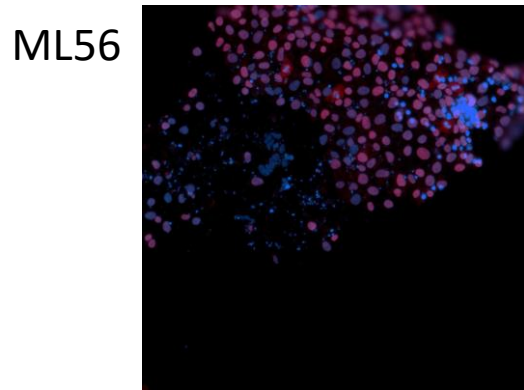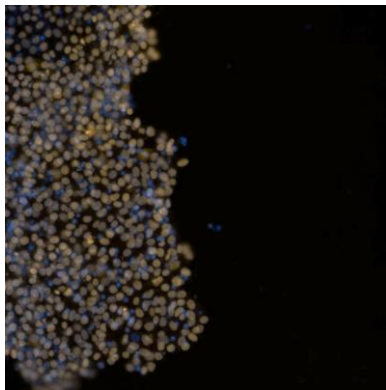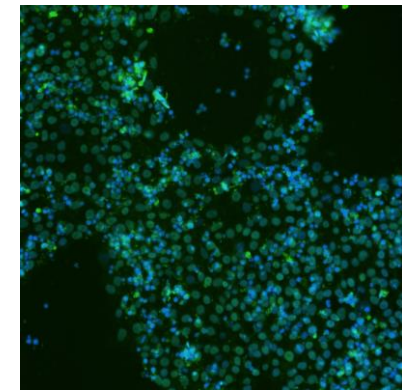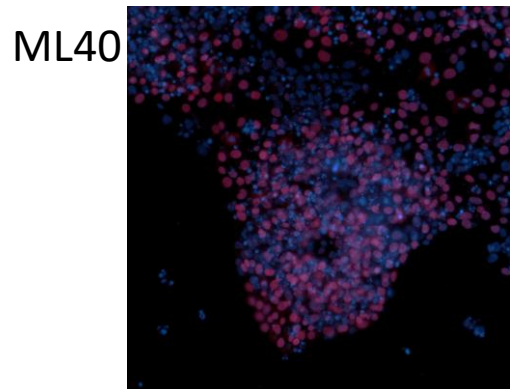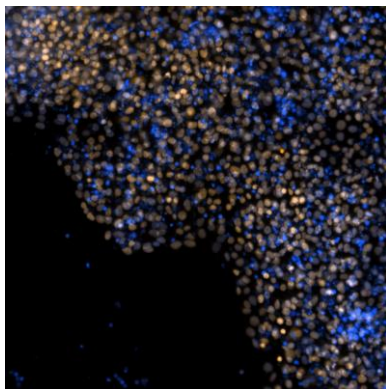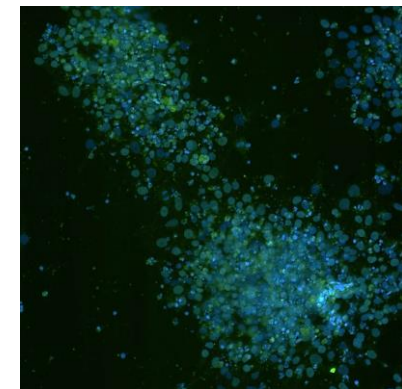

ML292

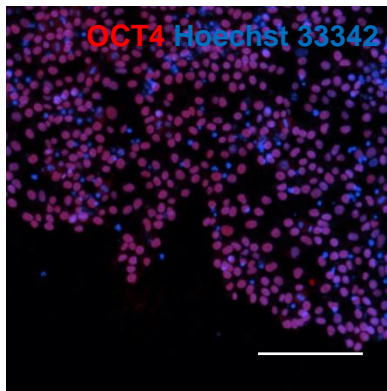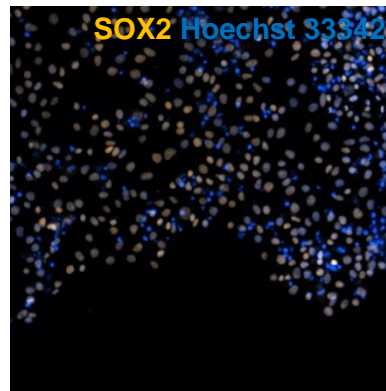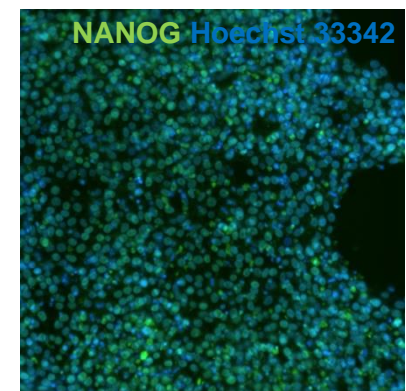

ML123

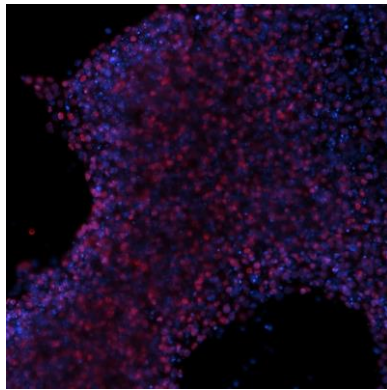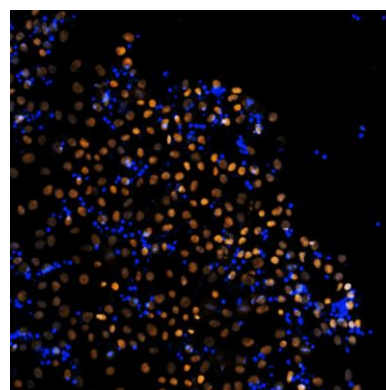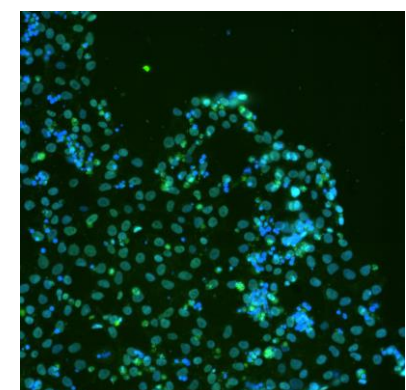

ML233

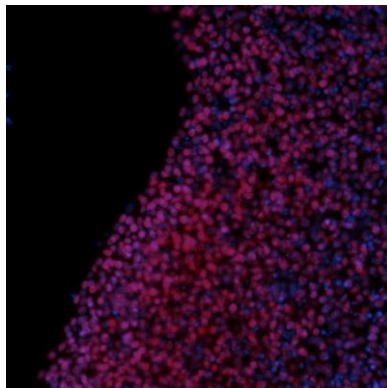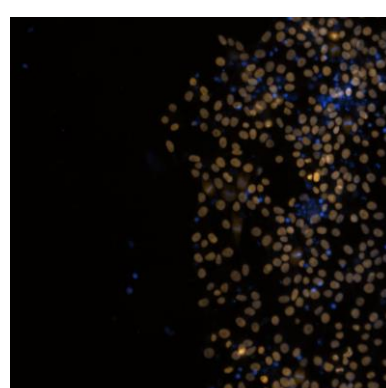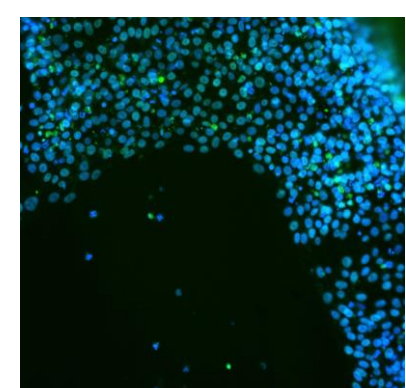

ML164

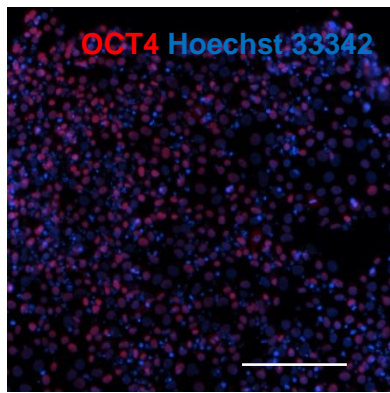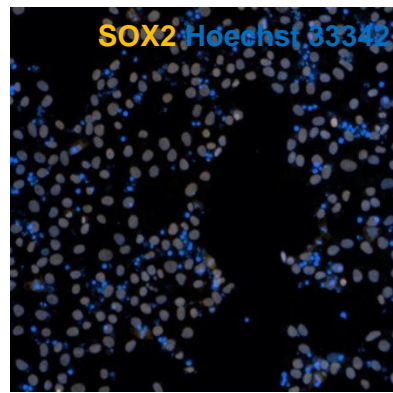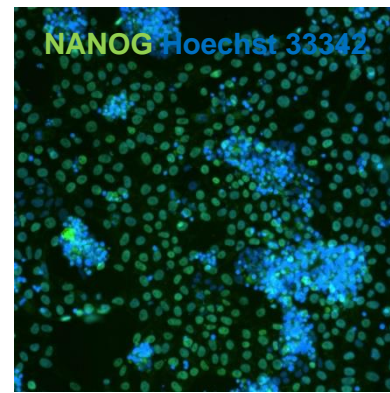

Supplement: jamapsychiatry-77-745-s001.pdf [file jamapsychiatry-77-745-s001.pdf]
